# Supplementary material for: Period teasing, stigma and knowledge: A survey of adolescent boys and girls in Northern Tanzania
Source: PubMed Central journal article supplement (PMC7592731; doi:10.1371/journal.pone.0239914), 2020-10-28
Supplement: pone.0239914.s001.pdf [file pone.0239914.s001.pdf]

## S1 Appendix

**Table 1. Relationship between boys' reported period teasing and specific restrictions on menstruating women in the home**

|                                                                 | Coefficient on<br>"Have teased girls about periods"<br><i>bin(0/1)</i><br>(1) | Sample<br>average<br>(2) |
|-----------------------------------------------------------------|-------------------------------------------------------------------------------|--------------------------|
| <i>"In my house, menstruating women are restricted from..."</i> |                                                                               |                          |
| Touching water<br>or animals                                    | 0.123**<br>(2.19)                                                             | 0.161                    |
| Cooking                                                         | 0.0473<br>(1.03)                                                              | 0.293                    |
| Washing<br>dishes                                               | 0.0501<br>(0.86)                                                              | 0.156                    |
| Public<br>gatherings                                            | 0.131**<br>(2.48)                                                             | 0.179                    |
| Sleeping in<br>normal spot                                      | 0.344***<br>(3.86)                                                            | 0.060                    |
| Using normal<br>latrine                                         | -0.0355<br>(-0.49)                                                            | 0.087                    |
| Other                                                           | 0.0724<br>(0.91)                                                              | 0.069                    |
| Observations                                                    | 357                                                                           |                          |

Notes: Controls (not reported) are age, grade, and menstrual knowledge score. School fixed effects included.

**Fig 1. Knowledge Questions**

| Question                                                                | Correct Answer | Correct | Incorrect/DK | NA    |
|-------------------------------------------------------------------------|----------------|---------|--------------|-------|
| Q2: How often does a girl generally get her period?                     | Once a month   | 310     | 120          | 2     |
| Q3: How long does avg. period last?                                     | A few days     | 71.76   | 27.78        | 0.46  |
| Q4: At what age girls generally get first period?                       | 11-16          | 211     | 217          | 4     |
| Q5: At what age women stop getting periods?                             | 45-55          | 49.3    | 50.23        | 0.93  |
| Q6a: When girl reaches menarche, she can get pregnant from sex (Y/N/DK) | Y              | 340     | 63           | 29    |
| Q6b: Menstrual blood is shedding of endometrium (Y/N/DK)                | Y              | 78.7    | 14.58        | 6.71  |
| Q6c: Menstrual period means woman is not pregnant (Y/N/DK)              | Y              | 220     | 165          | 47    |
| Q6d: Ovulation happens 14 days after period (Y/N/DK)                    | Y              | 50.93   | 38.19        | 10.88 |
| Q6e: Ovulation happens during period (Y/N/DK)                           | N              | 369     | 57           | 6     |
| Q6f: Common for girls to have physical discomfort on period? (Y/N/DK)   | Y              | 85.42   | 13.19        | 1.39  |
|                                                                         |                | 258     | 161          | 13    |
|                                                                         |                | 59.72   | 37.27        | 3.01  |
|                                                                         |                | 267     | 154          | 11    |
|                                                                         |                | 61.81   | 35.65        | 2.55  |
|                                                                         |                | 228     | 180          | 24    |
|                                                                         |                | 52.78   | 41.67        | 5.56  |
|                                                                         |                | 227     | 142          | 33    |
|                                                                         |                | 52.55   | 32.87        | 7.63  |
|                                                                         |                | 274     | 137          | 21    |
|                                                                         |                | 63.43   | 38.66        | 4.86  |
