# Supplementary material for: Period teasing, stigma and knowledge: A survey of adolescent boys and girls in Northern Tanzania
Source: PubMed Central journal article supplement (PMC7592731; doi:10.1371/journal.pone.0239914), 2020-10-28
Supplement: pone.0239914.s004.pdf [file pone.0239914.s004.pdf]

**SUPPLEMENTARY MATIERAL**

QUESTIONNAIRE for "Period teasing, stigma and knowledge: a survey of adolescent boys and girls in Northern Tanzania"  
by Benschaul-Tolonen et al. 2020

Surveying date:

School ID:

Classroom ID:

Student ID:

---

## **BOYS QUESTIONNAIRE**

**Dodoso**

### **Kipengele 1: Marafiki**

1. Sasa tungependa utuambie kuhusu marafiki 5 wa KIUME wa karibu zaidi ulio nao shuleni. Tafadhali taja majina ya marafiki zako wa karibu kabisa. Taja tu marafiki ambao wanasoma shule hii, na ambao wapo darasa moja na wewe, na unaowahesabu kama marafiki.

*Andika majina yao kamili na darasa la marafiki uliowataja*

- a. \_\_\_\_\_
- b. \_\_\_\_\_
- c. \_\_\_\_\_
- d. \_\_\_\_\_
- e. \_\_\_\_\_

2. **Kwa maoni yako, ni wavulana gani maarufu zaidi shuleni?**

*Andika majina kamili na darasa la wavulana uliowataja*

- a. \_\_\_\_\_
- b. \_\_\_\_\_
- c. \_\_\_\_\_
- d. \_\_\_\_\_
- e. \_\_\_\_\_

### **Kipengele 2: Taarifa**

*Tungependa kukuuliza maswali kuhusu hedhi.*

1. Kwanini msichana au mwanamke anapata hedhi? Chagua yote yanayokubalika
  - a.  dhambi binafsi
  - b.  kutokana na nguvu za giza
  - c.  kwa sababu hakupata mimba mwezi huo
  - d.  kutoa damu mbaya
  - e.  mengine
  - f.  Sijui
2. Ni mara ngapi msichana (ambaye ameshavunja ungo) anapata hedhi kwa wastani? (Chagua moja)
  - mara moja katika maisha yake
  - mara moja kila mwaka
  - kila wiki
  - mara moja kila mwezi
  - sijui
3. Kwa wastani hedhi huwa inachukua muda gani? (Chagua moja)
  - saa moja

## SUPPLEMENTARY MATIERAL

QUESTIONNAIRE for "Period teasing, stigma and knowledge: a survey of adolescent boys and girls in Northern Tanzania"  
by Benschaul-Tolonen et al. 2020

Surveying date:

School ID:

Classroom ID:

Student ID:

- siku moja
- siku kadhaa
- wiki mbili
- muda wote

4. Kiujumla ni katika umri gani wasichana huwa wanapata hedhi yao kwa mara ya kwanza?

---

5. Katika umri gani wanawake hufikia ukomo wa kupata hedhi?

---

6. Chagua jibu sahihi.

*Tafadhali chagua Ndio au Hapana kuashiria kama kauli zifuatazo ni za ukweli.*

a) Wakati msichana akivunja ungo (akipata hedhi kwa mara ya kwanza), iamaanisha anaweza kupata mimba kama atafanya mapenzi.

Ndio  Hapana  Sijui

b) Damu ya kipindi cha hedhi hutokana na kumwaga damu ya ukuta ndani ya tumbo la uzazi

Ndio  Hapana  Sijui

c) Hedhi huashiria kwamba mwanamke hana mimba

Ndio  Hapana  Sijui

d) Kupevuka mayai hutokea kwa wastani siku 14 kabla ya hedhi

Ndio  Hapana  Sijui

e) Kupevuka mayai hutokea kipindi cha hedhi

Ndio  Hapana  Sijui

f) Je, huwa ni kawaida kwa wasichana kujisikia maumivu ya kimwili wakipata hedhi?

Ndio  Hapana  Sijui

g) Je, wasichana hupitia yafuatayo wakiwa hedhini?

Hisia mbaya zisizozuilika [hasira]  Ndio  Hapana  Sijui

Mfadhaiko  Ndio  Hapana  Sijui

Uchovu mkali  Ndio  Hapana  Sijui

### Kipengele 3: Uzoefu Binafsi

1. Kuna mtu yeyote amewahi kukuambia kuhusu hedhi na kwanini inatokea?

NDIO  HAPANA

Kama ndio, nani? Tafadhali chagua zote zinazokubalika.

mama  baba

bibi  babu

dada  kaka

## SUPPLEMENTARY MATERIAL

QUESTIONNAIRE for "Period teasing, stigma and knowledge: a survey of adolescent boys and girls in Northern Tanzania"  
by Benschaul-Tolonen et al. 2020

Surveying date:

School ID:

Classroom ID:

Student ID:

- |                                                             |                                                         |
|-------------------------------------------------------------|---------------------------------------------------------|
| <input type="checkbox"/> rafiki wa kike                     | <input type="checkbox"/> rafiki wa kiume                |
| <input type="checkbox"/> shangazi au ndugu mwingine wa kike | <input type="checkbox"/> mjomba au ndugu wa kiume       |
| <input type="checkbox"/> nesi                               | <input type="checkbox"/> mchungaji / kiongozi wa kidini |
| <input type="checkbox"/> mwalimu wa kike                    | <input type="checkbox"/> mwalimu wa kiume               |
| <input type="checkbox"/> mpenzi/mwenza                      | <input type="checkbox"/> mwingine                       |

2. Uliwahi kupokea taarifa kuhusu hedhi kutoka kwa wafuatao:

- |                         |                               |                                 |
|-------------------------|-------------------------------|---------------------------------|
| a) Mtandaoni            | <input type="checkbox"/> NDIO | <input type="checkbox"/> HAPANA |
| b) Mtoa huduma ya afaya | <input type="checkbox"/> NDIO | <input type="checkbox"/> HAPANA |
| c) Mtaala wa shule      | <input type="checkbox"/> NDIO | <input type="checkbox"/> HAPANA |
| d) Vipeperushi          | <input type="checkbox"/> NDIO | <input type="checkbox"/> HAPANA |
- (matangazo, mabango)

3. Ulifanya nini uliposikia kuhusu hedhi mara ya kwanza? (Tafadhali chagua moja kutoka kila kundi la hizo 3, ambapo 2 ni katikati.)

|                                                                                                        | 1                        | 2                        | 3                        |                    |
|--------------------------------------------------------------------------------------------------------|--------------------------|--------------------------|--------------------------|--------------------|
|  ulishangaa         | <input type="checkbox"/> | <input type="checkbox"/> | <input type="checkbox"/> | hukushangaa        |
|  uliogopa           | <input type="checkbox"/> | <input type="checkbox"/> | <input type="checkbox"/> | hukuogopa          |
|  ulipata msisimko   | <input type="checkbox"/> | <input type="checkbox"/> | <input type="checkbox"/> | hukusisimka        |
|  ulichanganyikiwa   | <input type="checkbox"/> | <input type="checkbox"/> | <input type="checkbox"/> | hukuchanganyikiwa  |
|  ulijisikia ujasiri | <input type="checkbox"/> | <input type="checkbox"/> | <input type="checkbox"/> | hukujisikia jasiri |
|  ulisikia kinyaa    | <input type="checkbox"/> | <input type="checkbox"/> | <input type="checkbox"/> | hukusikia kinyaa   |
|  ulijivunia         | <input type="checkbox"/> | <input type="checkbox"/> | <input type="checkbox"/> | hukujivunia        |
|  ulijionea haya     | <input type="checkbox"/> | <input type="checkbox"/> | <input type="checkbox"/> | hukujionea haya    |

### Kipengele 4: Uratibu wa Hedhi kwa wanarika

1. Tafadhali kadiria kiasi cha wanafunzi wenzako wa kike ambao tayari wamevunja ungo Utapokea dola 1 ya kimarekani ukikisia jibu sahihi.

**SUPPLEMENTARY MATIERAL**

QUESTIONNAIRE for "Period teasing, stigma and knowledge: a survey of adolescent boys and girls in Northern Tanzania"  
by Benshaul-Tolonen et al. 2020

Surveying date:

School ID:

Classroom ID:

Student ID:

---

|                                  |  |
|----------------------------------|--|
| <input type="checkbox"/> 0%      |  |
| <input type="checkbox"/> 1-25%   |  |
| <input type="checkbox"/> 26-50%  |  |
| <input type="checkbox"/> 51-75%  |  |
| <input type="checkbox"/> 76-100% |  |

2. Mara nyingine wasichana hutaniwa kuhusu hedhi. Tafadhali kadiria kiasi cha wanafunzi wenzako wa kike ambao wamewahi kutaniwa kuhusu hedhi. Utapokea dola 1 ya kimarekani ukikisia jibu sahihi.

|                                  |  |
|----------------------------------|--|
| <input type="checkbox"/> 0%      |  |
| <input type="checkbox"/> 1-25%   |  |
| <input type="checkbox"/> 26-50%  |  |
| <input type="checkbox"/> 51-75%  |  |
| <input type="checkbox"/> 76-100% |  |

3. Tafadhali kisia njia **inayotumika zaidi** ya kujiweka safi miongoni mwa watu wa rika lako darasani. Tafadhali chagua moja.

|                                             |                                                                              |
|---------------------------------------------|------------------------------------------------------------------------------|
| <input type="checkbox"/> kitambaa           | <input type="checkbox"/> pedi                                                |
| <input type="checkbox"/> tampuni            | <input type="checkbox"/> bidhaa asilia (e.g. nyasi, majani, mavi ya ng'ombe) |
| <input type="checkbox"/> vigodoro           | <input type="checkbox"/> kikombe cha hedhi                                   |
| <input type="checkbox"/> hawatumii chochote | <input type="checkbox"/> nyingine _____                                      |

3. Unajiamini kiasi gani kwamba unajua nini wanafunzi wenzio wanatumia wakiwa hedhini?  
Sijiamini kabisa 1      2      3      4      5 Najiamini kabisa

4. Kama wanatumia pedi, unajua namna gani wanavyozitupa/[wanavyozitokomeza zikishatumika]?  
 NDIO       HAPANA

5. Kama ulijibu ndio kwenye swali lililopita, ni njia gani wanayoitumia zaidi?  
 hawatupi (wanatumia zaidi ya mara moja)  
 ndoo ya taka  
 choo  
 kuzichoma moto

**SUPPLEMENTARY MATIERAL**

QUESTIONNAIRE for "Period teasing, stigma and knowledge: a survey of adolescent boys and girls in Northern Tanzania"  
by Benschaul-Tolonen et al. 2020

Surveying date:

School ID:

Classroom ID:

Student ID:

---

kuzizika

nyingine \_\_\_\_\_

**Kipengele 5: Mienendo juu ya Hedhi**

1. Unajisikia salama kwenye vyoo vya shule?  
 NDIO  HAPANA
2. Huwa unajua wakati wanafunzi wenzako wa kike wakiwa hedhini?  
 NDIO  HAPANA
3. Unadhani wasichana wangejisikia aibu endapo utajua kwamba wapo hedhini?  
 NDIO  HAPANA
4. Je, unahisi kwamba kupata hedhi ni kitu ambacho kinapaswa kuwekwa siri shuleni?  
 NDIO  HAPANA
5. Unafikiri wasichana wanaogopa kuwaambia watu kuhusu hedhi zao?  
 NDIO  HAPANA
6. Je, ni sahihi kwa wasichana kuzungumza kuhusu hedhi zao mbele za watu?  
 Ni sahihi kabisa  Sahihi  Katikati  Sio sahihi  Sio sahihi kabisa
7. Nini kingetokea kama msichana angeongelea hedhi yake mbele za watu?  
\_\_\_\_\_
8. Mara nyingine huwa inajalisha nani msichana ataongea naye kuhusu hedhi yake.
  - a. Je, ni sahihi kwa wasichana kuongea kuhusu hedhi zao na wanafunzi wenzao wa kike?  
 Ni sahihi kabisa  Sahihi  Katikati  Sio sahihi  Sio sahihi kabisa
  - b. Je, ni sahihi kwa wasichana kuongea kuhusu hedhi zao na wanafunzi wenzao wa kiume?  
 Ni sahihi kabisa  Sahihi  Katikati  Sio sahihi  Sio sahihi kabisa
  - c. Je, ni sahihi kwa wasichana kuongea kuhusu hedhi zao na mwalimu wa kike?  
 Ni sahihi kabisa  Sahihi  Katikati  Sio sahihi  Sio sahihi kabisa
  - d. Je, ni sahihi kwa wasichana kuongea kuhusu hedhi zao na mwalimu wa kiume?  
 Ni sahihi kabisa  Sahihi  Katikati  Sio sahihi  Sio sahihi kabisa
  - e. Je, ni sahihi kwa wasichana kuongea kuhusu hedhi zao na baba zao?  
 Ni sahihi kabisa  Sahihi  Katikati  Sio sahihi  Sio sahihi kabisa
  - f. Je, ni sahihi kwa wasichana kuongea kuhusu hedhi zao na mama zao?  
 Ni sahihi kabisa  Sahihi  Katikati  Sio sahihi  Sio sahihi kabisa

## SUPPLEMENTARY MATERIAL

QUESTIONNAIRE for "Period teasing, stigma and knowledge: a survey of adolescent boys and girls in Northern Tanzania"  
by Benschaul-Tolonen et al. 2020

Surveying date:

School ID:

Classroom ID:

Student ID:

- 
9. Je, unakubaliana na kauli ifuatayo: "Nyumbani kwetu wanawake/wasichana lazima waone aibu kuongelea au kuweka wazi hedhi yao (damu, maumivu, vifaa vya kujiweka safi) mbele ya wanafamilia."  
 nakubaliana sana       nakubaliana     katikati       sikubaliani     sikubaliani kabisa
10. Unakubaliana na kauli ifuatayo: "Nyumbani kwetu, wanawake na wasichana ambao wako hedhini wanazuiliwa kufanya shughuli Fulani."  
 NDIO                       HAPANA                       Sijui

Kama ulijibu NDIO, shughuli gani? Chagua zote zinazokubalika

- a)  Kushika vyanzo vya maji au wanyama  
b)  Kupika  
c)  Kuosha vyombo  
d)  Mikutano ya hadhara kama vile mikutano ya kidini, mikutano ya jumuiya  
e)  Kulala sehemu yake ya kila siku  
f)  Kutuia choo ambacho uwa anatumia siku zote  
g)  Nyingine: \_\_\_\_\_
11. Ungependa kuwa namtu ambaye ungeweza kumuuliza kuhusu hedhi?  
 NDIO                                       HAPANA

### Kipengele 6: Teasing

1. Kutoka kwenye wale marafiki wa KIUME uliowaandika juu (Kipengele 1, Swali 1), **wangapi** umewaona wakiwatania wasichana kuhusu hedhi zao?  
 Hakuna       Rafiki 1     Marafiki 2     Marafiki 3     Marafiki 4     Marafiki 5
2. Kutoka wale marafiki uliowataja juu, ni wangapi kati yao umeshawahi kujadili masuala ya hedhi?  
 Hakuna       Rafiki 1     Marafiki 2     Marafiki 3     Marafiki 4     Marafiki 5
3. Je, marafiki wako wa karibu huwa wanawatania wasichana kuhusu hedhi? (kama Kamwe/Sijui, ruka hadi Swali 6)  
 Daima       Mara nyingi                       Mara chache                       Kamwe       Sijui
4. Kama ndio, huwa inatokea muda gani?  
 Wakiwa wanatoa harufu mbaya  
 Pindi nguo zao zikiwa na madoa ya damu  
 Pale wakiona pedi au vifaa vingine miongoni mwa mali za wasichana  
 Wakati wasichana wakiwa hawataki kushiriki kwenye michezo kwa sababu ya hedhi  
 Wakihisi kwamba msichana yuko hedhini  
 Mengineyo: \_\_\_\_\_

**SUPPLEMENTARY MATERIAL**

QUESTIONNAIRE for "Period teasing, stigma and knowledge: a survey of adolescent boys and girls in Northern Tanzania"  
by Benschaul-Tolonen et al. 2020

Surveying date:

School ID:

Classroom ID:

Student ID:

- 
5. Unafikiri kwa nini marafiki zako wanawatania wasichana kuhusu hedhi zao?
- Kwa sababu hedhi inaaibisha
  - Kwa sababu hedhi ni kitu kisicho cha asili
  - Kwa sababu hedhi inatokana na nguvu za giza
  - Kwa sababu hedhi ni dhambi
  - Kwa sababu wavulana wana mambo ya kitoto, au hawazielewi hedhi
- Mengineyo: \_\_\_\_\_
6. Umewahi kumtania msichana kuhusu hedhi?
- NDIO  HAPANA
7. Kama NDIO, lini? Chagua yote yanayokubalika.
- Wakiwa wananuka vibaya
  - Pindi nguo zao zikipata madoa ya damu
  - Pale nikiona pedi au vifaa vingine miongoni mwa mali za wasichana
  - Wakati wasichana wakiwa hawataki kushiriki kwenye michezo kwa sababu ya hedhi
  - Nikihisi kwamba msichana yuko hedhini
- Mengineyo: \_\_\_\_\_
8. Kama NDIO kwanini uliwatania?
- Kwa sababu hedhi inaaibisha
  - Kwa sababu hedhi ni kitu kisicho cha asili
  - Kwa sababu hedhi inatokana na nguvu za giza
  - Kwa sababu hedhi ni dhambi
  - Kwa sababu wavulana wengine pia walikuwa wanatania
- Mengineyo: \_\_\_\_\_
9. Lini mara ya mwisho umemtania msichana kuhusu hedhi?
- Ndani ya wiki iliyopita
  - Ndani ya mwezi uliopita
  - Ndani ya miezi 6 iliyopita
  - Ndani ya mwaka uliopita
  - Zaidi ya mwaka mmoja uliopita
10. Lini mara ya mwisho umeona **mwanafunzi mwenzako** anamtania msichana kuhusu hedhi?
- Ndani ya wiki iliyopita
  - Ndani ya mwezi uliopita
  - Ndani ya miezi 6 iliyopita
  - Ndani ya mwaka uliopita
  - Zaidi ya mwaka mmoja uliopita
11. Unafanya nini ukina mwanafunzi mwenzako anamtania msichana kuhusu hedhi yake?

## SUPPLEMENTARY MATERIAL

QUESTIONNAIRE for "Period teasing, stigma and knowledge: a survey of adolescent boys and girls in Northern Tanzania"  
by Benschaul-Tolonen et al. 2020

Surveying date:

School ID:

Classroom ID:

Student ID:

- 
- Sifanyi chochote
  - Nazungumza na mwanafunzi mwenzangu huyo aliyetania tukiwa faragha
  - Nazungumza na msichana aliyetaniwa tukiwa faragha
  - Namwambia mwanafunzi mwezangu aache
  - Mimi pia namtania huyo msichana
  - Namwambia mwalimu au mtu mzima mwingine
  
  - Mengineyo \_\_\_\_\_

### Kipengele 7: Wenza

1. Umewahi kuwa na mpenzi?  
 NDIO  HAPANA
2. Je, una mpenzi hivi sasa?  
 NDIO  HAPANA (nenda swali 31)
3. Mpenzi wako ana umri gani?  
\_\_\_\_\_
4. Je ni sawa kwa msichana kumuomba mpenzi wake kulipia bidhaa?  
 NDIO  HAPANA
- 30a. Kama ndio, nini? (chagua zote zinazokubalika)  
 nguo  chakula  pedi  mengineyo \_\_\_\_\_
5. Je ni sawa kwa mvulana kutarajia wasichana watafanya naye mapenzi baada ya kuwapa zawadi au kulipia bidhaa?  
 NDIO  HAPANA
6. Unakubali kwamba wasichana lazima waolewe mara tu baada ya kupata hedhi.  
 nakubaliana sana  nakubaliana  katikati  sikubaliani  sikubaliani kabisa
7. Unakubali kwamba wasichana wanakuwa wakubwa kiasi cha kutosha kufanya mapenzi baada ya kupata hedhi  
 nakubaliana sana  nakubaliana  katikati  sikubaliani  sikubaliani kabisa

### Kipengele 8: Maswali juu ya Vitu Tunavyovijali

1. Wazazi/walezi wangu wananihamasisha kufanya vyema shuleni  
 nakubaliana sana  nakubaliana  katikati  sikubaliani  sikubaliani kabisa
2. Walimu wangu hunitia moyo na kunipa msaada  
 nakubaliana sana  nakubaliana  katikati  sikubaliani  sikubaliani kabisa



**SUPPLEMENTARY MATIERAL**

QUESTIONNAIRE for "Period teasing, stigma and knowledge: a survey of adolescent boys and girls in Northern Tanzania"  
by Benschaul-Tolonen et al. 2020

Surveying date:

School ID:

Classroom ID:

Student ID:

- 
3. Elimu ni ya muhimu zaidi kwa wavulana kuliko kwa wasichana  
 nakubaliana sana       nakubaliana    katikati       sikubaliani    sikubaliani kabisa
  4. Huko mbeleni mambo yatakuwa sawa kwangu  
 nakubaliana sana       nakubaliana    katikati       sikubaliani    sikubaliani kabisa
  5. Nina wasiwasi karibu muda wote  
 nakubaliana sana       nakubaliana    katikati       sikubaliani    sikubaliani kabisa
  6. Nimeridhika na maisha yangu  
 nakubaliana sana       nakubaliana    katikati       sikubaliani    sikubaliani kabisa

**Kipengele 9: Demografia**

1. Jina lako nani? (la kwanza na la pili)  
\_\_\_\_\_
2. Umeishi muda gani katika makazi uliyopo? \_\_\_\_\_
3. Umezaliwa mwezi gani na mwaka gani? \_\_\_\_\_
4. Ulifikisha miaka mingapi kwenye tarehe yako ya kuzaliwa iliyopita?  
\_\_\_\_\_
5. Upo darasa la ngapi? \_\_\_\_\_
6. Ulianza shul ukiwa na umri gani? \_\_\_\_\_
7. Tafadhali chagua kabila lako linalokutambulisha  
 Mchagga  
 Mmasai  
 Msukuma  
 Mhaya  
 Msumbwa  
 kabila lingine: \_\_\_\_\_
8. Tafadhali chagua dhehebu linalokutambulisha  
 Mkristo  
 Muislamu  
 Dhehebu jingine: \_\_\_\_\_  
 Sina dhehebu
9. Unaishi na nani kwa sasa?  
 wazazi                       bibi na babu                       peke yangu  
 ndugu niliozaliwa nao    wanafamilia wengine    bweni la shule  
 bweni/hosteli binafsi                       nyingine \_\_\_\_\_

**SUPPLEMENTARY MATERIAL**

QUESTIONNAIRE for “Period teasing, stigma and knowledge: a survey of adolescent boys and girls in Northern Tanzania”  
by Benschaul-Tolonen et al. 2020

Surveying date:

School ID:

Classroom ID:

Student ID:

---

10. Unaweza kuoga nyumbani?

NDIO

HAPANA

11. Unatumia jumla ya kiasi gani cha pesa kwa mwezi? \_\_\_\_\_

12. Chanzo chako kikuu cha pesa ni kipi? Tafadhali chagua moja.

mama

baba

mpenzi

dada / kaka

nyingine

kazi

ufadhili

13. Huwa unaitumia [hela] kufanya nini? Tafadhali chagua matumizi makuu matatu.

nguo

usafi wa mwili

vipodozi

simu ya mkononi

nywele

vifaa vya shule

chakula

usafiri

nyingine

14. Je, umekosa kwenda shule ndani ya siku 7 zilizopita?

NDIO

HAPANA

Kama Ndio, sababu ilikuwa nini? \_\_\_\_\_

**SUPPLEMENTARY MATERIAL**

QUESTIONNAIRE for "Period teasing, stigma and knowledge: a survey of adolescent boys and girls in Northern Tanzania"  
by Benschaul-Tolonen et al. 2020

Surveying date:

School ID:

Classroom ID:

Student ID:

---

## **GIRLS QUESTIONNAIRE**

### **Dodoso**

#### **Kipengele 1: Marafiki**

1. Tungependa utuambie kuhusu marafiki zako 5 wa KIKE wa karibu kabisa ulionao shuleni. Tafadhali taja majina ya marafiki zako wa karibu kabisa. Taja tu marafiki ambao wanasoma shule hii, na ambao wako darasa moja na wewe, na ambao unawahesabu kama marafiki wa karibu.

*Andika majina kamili na darasa la marafiki uliowataja*

- a. \_\_\_\_\_
- b. \_\_\_\_\_
- c. \_\_\_\_\_
- d. \_\_\_\_\_
- e. \_\_\_\_\_

2. Sasa tungependa utuambie kuhusu marafiki wa KIUME wa karibu sana ulio nao shuleni. Tafadhali yataje majina ya marafiki zako wa karibu kabisa. Taja tu marafiki ambao wanasoma shule hii, na ambao wako darasa moja na wewe, na ambao unawahesabu kama marafiki wa karibu.

*Andika majina kamili na darasa la marafiki uliowataja*

- a. \_\_\_\_\_
- b. \_\_\_\_\_
- c. \_\_\_\_\_
- d. \_\_\_\_\_
- e. \_\_\_\_\_

#### **Kipengele 2: Taarifa**

*Tungependa kukuuliza maswali kadhaa kuhusu hedhi.*

1. Kwanini msichana au mwanamke anapata hedhi? Chagua yote yanayokubalika.
  - dhambi binafsi
  - kutokana na nguvu za giza
  - kwa sababu hakupata mimba hedhi huo
  - kutoa damu mbaya
  - mengineyo
  - sijui
2. Ni mara ngapi msichana (ambaye tayari ameshapata hedhi) anapata hedhi kwa wastani?
  - mara moja katika maisha yake
  - mara moja kila mwaka
  - kila wiki
  - kila hedhi
  - sijui

**SUPPLEMENTARY MATIERAL**

QUESTIONNAIRE for “Period teasing, stigma and knowledge: a survey of adolescent boys and girls in Northern Tanzania”  
by Benschaul-Tolonen et al. 2020

Surveying date:

School ID:

Classroom ID:

Student ID:

---

3. Kwa wastani hedhi huwa inachukua muda gani? Chagua moja.

- saa moja
- siku moja
- siku kadhaa
- wiki mbili
- muda wote
- sijui

4. Kiujumla ni katika umri gani wasichana huwa wanapata hedhi yao kwa mara ya kwanza?

---

5. Katika umri gani wanawake hufikia ukomo na kupata hedhi?

---

6. Chagua jibu sahihi

*Tafadhali chagua Ndio au Hapana kuashiria kama kauli zifuatazo ni za ukweli.*

a) Msichana akivunja ungo (kupata hedhi kwa mara ya kwanza), inamaanisha anaweza kupata mimba akifanya mapenzi.

Ndio  Hapana  Sijui

b) Damu ya kipindi cha hedhi hutokana na kumwaga damu ya ukuta ndani ya tumbo la uzazi

Ndio  Hapana  Sijui

c) Hedhi huashiria kwamba mwanamke hana mimba

Ndio  Hapana  Sijui

d) Kupevuka mayai hutokea kwa wastani siku 14 kabla ya hedhi

Ndio  Hapana  Sijui

e) Kupevuka mayai hutokea kipindi cha hedhi

Ndio  Hapana  Sijui

f) Je, huwa ni kawaida kwa wasichana kujisikia maumivu ya kimwili wakipata hedhi?

Ndio  Hapana  Sijui

g) Je, wasichana wengi hupitia yafuatayo wakiwa hedhini?

Hisia mbaya zisizozuilika [hasira]  Ndio  Hapana  Sijui

Mfadhaiko  Ndio  Hapana  Sijui

Uchovu mkali  Ndio  Hapana  Sijui

**Kipengele 3: Uzoefu Binafsi**

1. Kuna mtu yeyote amewahi kukuambia kuhusu hedhi na kwanini inatokea?

NDIO  HAPANA

Kama ndio, nani? Tafadhali chagua zote zinazokubalika.

mama  baba

**SUPPLEMENTARY MATIERAL**

QUESTIONNAIRE for "Period teasing, stigma and knowledge: a survey of adolescent boys and girls in Northern Tanzania"  
by Benschaul-Tolonen et al. 2020

Surveying date:

School ID:

Classroom ID:

Student ID:

- |                                                    |                                                         |
|----------------------------------------------------|---------------------------------------------------------|
| <input type="checkbox"/> bibi                      | <input type="checkbox"/> babu                           |
| <input type="checkbox"/> dada                      | <input type="checkbox"/> kaka                           |
| <input type="checkbox"/> Rafiki wa kike            | <input type="checkbox"/> rafiki wa kiume                |
| <input type="checkbox"/> shangazi au ndugu wa kike | <input type="checkbox"/> mjomba au ndugu wa kiume       |
| <input type="checkbox"/> nesi                      | <input type="checkbox"/> mchungaji / kiongozi wa kidini |
| <input type="checkbox"/> mwalimu wa kike           | <input type="checkbox"/> mwalimu wa kiume               |
| <input type="checkbox"/> mpenzi/mwenza             | <input type="checkbox"/> mwingine                       |

2. Uliwahi kupokea taarifa kuhusu hedhi kutoka kwa wafuatao:

- |                                                               |                               |                                 |
|---------------------------------------------------------------|-------------------------------|---------------------------------|
| • Mtandaoni                                                   | <input type="checkbox"/> NDIO | <input type="checkbox"/> HAPANA |
| • Mtoa huduma ya afya                                         | <input type="checkbox"/> NDIO | <input type="checkbox"/> HAPANA |
| • Machapisho ya shuleni<br>(vitabu, madarasa, homework, n.k.) | <input type="checkbox"/> NDIO | <input type="checkbox"/> HAPANA |
| • Vipeperushi<br>(matangazo, mabango)                         | <input type="checkbox"/> NDIO | <input type="checkbox"/> HAPANA |

3. Ulifanya nini uliposikia kuhusu hedhi mara ya kwanza? (Tafadhali chagua moja kutoka kila kundi la hizo 3, ambapo 2 ni katikati.)

|                                                                                                        | 1                        | 2                        | 3                        |                    |
|--------------------------------------------------------------------------------------------------------|--------------------------|--------------------------|--------------------------|--------------------|
|  ulishangaa         | <input type="checkbox"/> | <input type="checkbox"/> | <input type="checkbox"/> | sikushangaa        |
|  uliogopa           | <input type="checkbox"/> | <input type="checkbox"/> | <input type="checkbox"/> | sikuogopa          |
|  ulipata msisimko   | <input type="checkbox"/> | <input type="checkbox"/> | <input type="checkbox"/> | hukusisimka        |
|  ulichanganyikiwa   | <input type="checkbox"/> | <input type="checkbox"/> | <input type="checkbox"/> | hukuchanganyikiwa  |
|  ulijisikia ujasiri | <input type="checkbox"/> | <input type="checkbox"/> | <input type="checkbox"/> | hukujisikia jasiri |
|  ulisikia kinyaa    | <input type="checkbox"/> | <input type="checkbox"/> | <input type="checkbox"/> | hukusikia kinyaa   |
|  ulijivunia         | <input type="checkbox"/> | <input type="checkbox"/> | <input type="checkbox"/> | hukujivunia        |
|  ulijionea haya     | <input type="checkbox"/> | <input type="checkbox"/> | <input type="checkbox"/> | hukujionea haya    |

4. Kuna mtu amewahi kukuambia nini unapaswa kufanya ukianza kupata hedhi?

- NDIO                       HAPANA

Kama ndio, ulipokea ushauri gani? Tafadhali chagua yote yanayokubalika.

**SUPPLEMENTARY MATIERAL**

QUESTIONNAIRE for "Period teasing, stigma and knowledge: a survey of adolescent boys and girls in Northern Tanzania"  
by Benschaul-Tolonen et al. 2020

Surveying date:

School ID:

Classroom ID:

Student ID:

- namna ya kutumia taulo/vitambaa/vitambaa vya pamba
- namna ya kubakia msafi/kunawa
- namna ya kumudu mauimivu
- mambo/shughuli za kuepuka wakati wa hedhi
- mengineyo \_\_\_\_\_

5. Weka alama kwa watu wote ambao UNGEPENDA kuongea nao kuhusu hedhi yako.

- |                                                             |                                                         |
|-------------------------------------------------------------|---------------------------------------------------------|
| <input type="checkbox"/> mama                               | <input type="checkbox"/> baba                           |
| <input type="checkbox"/> bibi                               | <input type="checkbox"/> babu                           |
| <input type="checkbox"/> dada                               | <input type="checkbox"/> kaka                           |
| <input type="checkbox"/> rafiki wa kike                     | <input type="checkbox"/> rafiki wa kiume                |
| <input type="checkbox"/> shangazi au ndugu mwingine wa kike | <input type="checkbox"/> mjomba au ndugu wa kiume       |
| <input type="checkbox"/> nesi                               | <input type="checkbox"/> mchungaji / kiongozi wa kidini |
| <input type="checkbox"/> mwalimu wa kike                    | <input type="checkbox"/> mwalimu wa kiume               |
| <input type="checkbox"/> mpenzi/mwenza                      | <input type="checkbox"/> mwingine                       |
| <input type="checkbox"/> hakuna hata mtu mmoja              |                                                         |

6. Na nani USINGEPENDA KABISA kuongea naye kuhusu hedhi yako. Tafadhali chagua yote yanayokubalika.

- |                                                             |                                                         |
|-------------------------------------------------------------|---------------------------------------------------------|
| <input type="checkbox"/> mama                               | <input type="checkbox"/> baba                           |
| <input type="checkbox"/> bibi                               | <input type="checkbox"/> babu                           |
| <input type="checkbox"/> dada                               | <input type="checkbox"/> kaka                           |
| <input type="checkbox"/> rafiki wa kike                     | <input type="checkbox"/> rafiki wa kiume                |
| <input type="checkbox"/> shangazi au ndugu mwingine wa kike | <input type="checkbox"/> mjomba au ndugu wa kiume       |
| <input type="checkbox"/> nesi                               | <input type="checkbox"/> mchungaji / kiongozi wa kidini |
| <input type="checkbox"/> mwalimu wa kike                    | <input type="checkbox"/> mwalimu wa kiume               |
| <input type="checkbox"/> mpenzi/mwenza                      | <input type="checkbox"/> mwingine                       |
| <input type="checkbox"/> hakuna hata mtu mmoja              |                                                         |

7. Umeshapata hedhi yako?

- Ndio (**endelea swali linalofuata**)       Hapana (**nenda Kipengele 4, Swali 1**)

8. Katika umri gani ulipata hedhi mara ya kwanza? \_\_\_\_\_

9. Je, ulipopata hedhi mara ya kwanza ilikuwa kitu cha hali ya chanya, hasi, au hali tu ya kawaida?

- chanya                       hasi                       katikati

10. Ulijisikiaje ulipopata hedhi kwa mara ya kwanza? Ulikuwa...  
(Tafadhali chagua moja kutoka kila kundi la hizo 3, ambapo 2 ni katikati.)

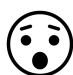

ulishangaa

1

2

3

sikushangaa

**SUPPLEMENTARY MATIERAL**

QUESTIONNAIRE for "Period teasing, stigma and knowledge: a survey of adolescent boys and girls in Northern Tanzania"  
by Benschaul-Tolonen et al. 2020

Surveying date:

School ID:

Classroom ID:

Student ID:

---

|                                                                                   |                    |                          |                          |                          |                    |
|-----------------------------------------------------------------------------------|--------------------|--------------------------|--------------------------|--------------------------|--------------------|
|  | uliogopa           | <input type="checkbox"/> | <input type="checkbox"/> | <input type="checkbox"/> | sikuogopa          |
|  | ulipata msisimko   | <input type="checkbox"/> | <input type="checkbox"/> | <input type="checkbox"/> | hukusisimka        |
|  | ulichanganyikiwa   | <input type="checkbox"/> | <input type="checkbox"/> | <input type="checkbox"/> | hukuchanganyikiwa  |
|  | ulijisikia ujasiri | <input type="checkbox"/> | <input type="checkbox"/> | <input type="checkbox"/> | hukujisikia jasiri |
|  | ulisikia kinyaa    | <input type="checkbox"/> | <input type="checkbox"/> | <input type="checkbox"/> | hukusikia kinyaa   |
|  | ulijivunia         | <input type="checkbox"/> | <input type="checkbox"/> | <input type="checkbox"/> | hukujivunia        |
|  | ulijionea haya     | <input type="checkbox"/> | <input type="checkbox"/> | <input type="checkbox"/> | hukujionea haya    |

11. Fikiria nyuma hadi muda kabla hujapata hedhi. Mtu yeyote alikuambia kuhusu hedhi kabla haijaanza?

NDIO

HAPANA

Kama ndio, nani? Tafadhali chagua zote zinazokubali.

mama

baba

bibi

babu

dada

kaka

rafiki wa kike

rafiki wa kiume

shangazi au ndugu mwingine wa kike

mjomba au ndugu wa kiume

nesi

mchungaji / kiongozi wa kidini

mwalimu wa kike

mwalimu wa kiume

mpenzi/mwenza

mwingine

12. Hedhi yako huwa inadumu kwa siku ngapi/Hedhi yako huwa inachukua muda gani kuisha?  
siku \_\_\_\_\_

13. Kwenye kipimo cha 1 hadi 5 ambapo 1 ni hakuna maumivu na 5 ni maumivu makali sana; Huwa unapata maumivu ya kimwili kiasi gani ukiwa kwenye hedhi?

**1**

**2**

**3**

**4**

**5**

*Sipati maumivu kabisa*

*Maumivu makali sana*

14. Kwenye kipimo cha 1 hadi 5 ambapo 1 ni kutokwa damu kidogo na 5 ni kutokwa damu nyingi; Unatoka damu kiasi gani ukiwa hedhini?

**1**

**2**

**3**

**4**

**5**

*Natokwa damu kidogo*

*Natokwa damu nyingi*

**SUPPLEMENTARY MATIERAL**

QUESTIONNAIRE for "Period teasing, stigma and knowledge: a survey of adolescent boys and girls in Northern Tanzania"  
by Benschaul-Tolonen et al. 2020

Surveying date:

School ID:

Classroom ID:

Student ID:

---

15. Kwenye kipimo cha 1 hadi 5, ambapo 1 ni maumivu machache na 5 ni maumivu zaidi na 3 ni sawa; Unalinganisha vipi maumivu ambayo wewe unajisikia ukipata hedhi na ambayo wanayapata wasichana wa rika lako?

|                                    | 1                        | 2                        | 3                        | 4                        | 5                        |
|------------------------------------|--------------------------|--------------------------|--------------------------|--------------------------|--------------------------|
| Ninapata maumivu kidogo kuliko wao | <input type="checkbox"/> | <input type="checkbox"/> | <input type="checkbox"/> | <input type="checkbox"/> | <input type="checkbox"/> |
| Ninapata maumivu mengi zaidi       |                          |                          |                          |                          | <input type="checkbox"/> |

16. Kwenye kipimo cha 1 hadi 5 ambapo 1 ni kutokwa damu kidogo zaidi na 5 ni damu nyingi zaidi na 3 ni sawa; Unafikiri wewe unatokwa damu nyingi zaidi, kidogo zaidi, au sawa na wenzako?

|                             | 1                        | 2                        | 3                        | 4                        | 5                        |
|-----------------------------|--------------------------|--------------------------|--------------------------|--------------------------|--------------------------|
| Ninatokwa damu kidogo zaidi | <input type="checkbox"/> | <input type="checkbox"/> | <input type="checkbox"/> | <input type="checkbox"/> | <input type="checkbox"/> |
| Ninatokwa damu nyingi zaidi |                          |                          |                          |                          | <input type="checkbox"/> |

17. Kipindi cha hedhi kinadumu kuanzia siku ya kwanza ya hedhi (kutokwa damu) hadi siku moja kabla ya mwanzo wa kipindi kingine cha hedhi (siku ya kwanza kutokwa damu). Unajua wewe mzunguko wa hedhi yako unachukua muda gani kwa wastani? Kwa maana nyingine, huwa unatunza kumbukumbu ya kwamba unatokwa damu baada ya muda gani?

NDIO  HAPANA

18. Unafikiri kwamba kwako muda kati ya hedhi na hedhi unatofautiana sana?

NDIO  HAPANA

19. Je, inakuwia vigumu kujua kwamba utapata hedhi hivi karibuni na kujiandaa?

NDIO  HAPANA

20. Ukiwa hedhini, au punde tu kabla, huwa unapata...:

Hisia mbaya zisizozuilika [hasira]  NDIO  HAPANA

Mfadhaiko au woga?  NDIO  HAPANA

Uchovu mkali?  NDIO  HAPANA

21. Huwa unatumia dawa za maumivu? (kama vile paracetamol) kumudu maumivu ukipata hedhi?

Daima  Mara moja moja  Mara chache  Kamwe

**Kipengele 5: Bidhaa Za Hedhi**



## SUPPLEMENTARY MATERIAL

QUESTIONNAIRE for "Period teasing, stigma and knowledge: a survey of adolescent boys and girls in Northern Tanzania"  
by Benschaul-Tolonen et al. 2020

Surveying date:

School ID:

Classroom ID:

Student ID:

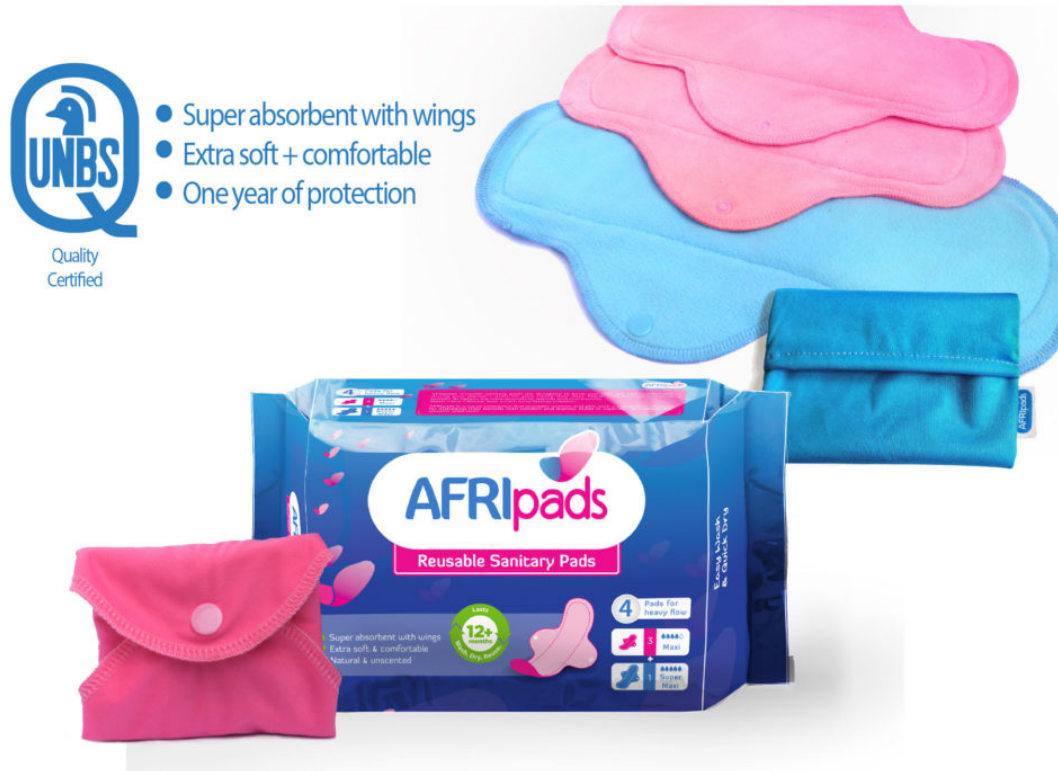

Pedi za kusafisha zinazotumika zaidi ya mara moja ni kitambaa kinachovaliwa kwenye chupi (nguo ya ndani) kuzuia damu ya hedhi kuvujia kwenye nguo. Inaweza kuoshwa, kukaushwa na kutumiwa kwa mwaka 1. Picha hapo juu inaonesha Afripads, aina mojawapo ya pedi za kutumiwa zaidi ya mara moja. Kila pakiti ina pedi 4.

1. Je umewahi Kuona ama Kusikia kuhusu pedi za kusafisha zinazotumika Zaidi ya mara moja?

Ndio

Hapana

2. Je umewahi Kutumia pedi za kusafisha zinazotumika Zaidi ya mara moja?

Ndio

Hapana

3. Huwa unatumia nini **maru moja moja** ukiwa hedhini? Tafadhali chagua **yote yanayokubalika**.

kitambaa

pedi

tampuni

bidhaa asilia (e.g. nyasi, majani, mavi ya ng'ombe)

vigodoro

kikombe cha hedhi

situmii chochote

nyingine \_\_\_\_\_

pedi za kusafisha

4. Kipi huwa unakitumia **maru nyingi** ukiwa hedhini? Tafadhali chagua **moja tu**.

## SUPPLEMENTARY MATERIAL

QUESTIONNAIRE for "Period teasing, stigma and knowledge: a survey of adolescent boys and girls in Northern Tanzania"  
by Benschaul-Tolonen et al. 2020

Surveying date:

School ID:

Classroom ID:

Student ID:

- |                                            |                                                                              |
|--------------------------------------------|------------------------------------------------------------------------------|
| <input type="checkbox"/> kitambaa          | <input type="checkbox"/> pedi                                                |
| <input type="checkbox"/> tampuni           | <input type="checkbox"/> bidhaa asilia (e.g. nyasi, majani, mavi ya ng'ombe) |
| <input type="checkbox"/> vigodoro          | <input type="checkbox"/> kikombe cha hedhi                                   |
| <input type="checkbox"/> situmii chochote  | <input type="checkbox"/> nyingine _____                                      |
| <input type="checkbox"/> pedi za kusafisha |                                                                              |

5. Je, umewahi kutumia kitambaa?

- NDIO  HAPANA

a. Kama umewahi kutumia kitambaa, huwa unafua na sabuni vitambaa unavyotumia ukiwa hedhini?

- NDIO  HAPANA  Situmii kitambaa

b. Kama huwa unatumia kitambaa, huwa unavikausha juani vitambaa ulivyovifua?

- NDIO  HAPANA  Situmii kitambaa

Kama hapana, wapi \_\_\_\_\_

6. Ni njia ipi ya kujiweka safi unaipendelea zaidi? Tafadhali chagua moja.

- |                                            |                                                                              |
|--------------------------------------------|------------------------------------------------------------------------------|
| <input type="checkbox"/> kitambaa          | <input type="checkbox"/> pedi                                                |
| <input type="checkbox"/> tampuni           | <input type="checkbox"/> bidhaa asilia (e.g. nyasi, majani, mavi ya ng'ombe) |
| <input type="checkbox"/> vigodoro          | <input type="checkbox"/> kikombe cha hedhi                                   |
| <input type="checkbox"/> situmii chochote  | <input type="checkbox"/> nyingine _____                                      |
| <input type="checkbox"/> pedi za kusafisha |                                                                              |

7. Je, daima huwa unatumia hiyo njia unayoipendelea zaidi?

- NDIO  HAPANA

8. Fikiria hedhi mmoja ambapo haukutumia hiyo njia unayoipendelea zaidi. Kwanini

**HAUKUTUMIA** njia unayoipendelea zaidi?

- |                                                         |                                                               |
|---------------------------------------------------------|---------------------------------------------------------------|
| <input type="checkbox"/> hakuna hela ya kutosha kununua | <input type="checkbox"/> njia hiyo ilikuwa haipatikani        |
| <input type="checkbox"/> kukosa ruhusa ya wazazi        | <input type="checkbox"/> Sikujua jinsi ya kuitumia [kuipata?] |
| <input type="checkbox"/> niliona aibu                   | <input type="checkbox"/> hiyo njia haikuwa salama             |
| <input type="checkbox"/> nyingine _____                 |                                                               |

9. Ni mara ngapi unabadilisha kifaa cha kukuweka safi kila siku unapokuwa hedhini?

\_\_\_\_\_

10. Unatupaje vifaa vya kujiweka safi (**ile uliyoichagua kwenye swali 24**)?

- |                                                          |                                         |
|----------------------------------------------------------|-----------------------------------------|
| <input type="checkbox"/> Siitupi (naitumia kwa kuirudia) | <input type="checkbox"/> ndoo ya taka   |
| <input type="checkbox"/> chooni                          | <input type="checkbox"/> naichoma       |
| <input type="checkbox"/> naizika                         | <input type="checkbox"/> nyingine _____ |

### Kipengele 5: Uratibu wa Hedhi kwa wanarika

1. Tafadhali kadiria kiasi cha wanafunzi wenzako wa kike ambao tayari wamevunja ungo.

- 0% 

**SUPPLEMENTARY MATERIAL**

QUESTIONNAIRE for "Period teasing, stigma and knowledge: a survey of adolescent boys and girls in Northern Tanzania"  
by Benschaul-Tolonen et al. 2020

Surveying date:

School ID:

Classroom ID:

Student ID:

---

|                                  |                                                                                   |                                                                                   |                                                                                   |                                                                                   |
|----------------------------------|-----------------------------------------------------------------------------------|-----------------------------------------------------------------------------------|-----------------------------------------------------------------------------------|-----------------------------------------------------------------------------------|
| <input type="checkbox"/> 1-25%   |  |  |  |  |
| <input type="checkbox"/> 26-50%  |  |  |  |  |
| <input type="checkbox"/> 51-75%  |  |  |  |  |
| <input type="checkbox"/> 76-100% |  |  |  |  |

2. Mara nyingine wasichana hutaniwa kuhusu hedhi. Tafadhali kadiria kiasi cha wanafunzi wenzako wa kike ambao wamewahi kutaniwa kuhusu hedhi.

|                                  |                                                                                     |                                                                                     |                                                                                     |                                                                                     |
|----------------------------------|-------------------------------------------------------------------------------------|-------------------------------------------------------------------------------------|-------------------------------------------------------------------------------------|-------------------------------------------------------------------------------------|
| <input type="checkbox"/> 0%      |    |    |    |    |
| <input type="checkbox"/> 1-25%   |    |    |    |    |
| <input type="checkbox"/> 26-50%  |   |   |   |   |
| <input type="checkbox"/> 51-75%  |  |  |  |  |
| <input type="checkbox"/> 76-100% |  |  |  |  |

3. Tafadhali kadiria njia **inayotumika zaidi** ya kujiweka safi miongoni mwa watu wa rika lako darasani. Tafadhali chagua moja.

|                                            |                                                                              |
|--------------------------------------------|------------------------------------------------------------------------------|
| <input type="checkbox"/> kitambaa          | <input type="checkbox"/> pedi                                                |
| <input type="checkbox"/> tampuni           | <input type="checkbox"/> bidhaa asilia (e.g. nyasi, majani, mavi ya ng'ombe) |
| <input type="checkbox"/> vigodoro          | <input type="checkbox"/> kikombe cha hedhi                                   |
| <input type="checkbox"/> situmii chochote  | <input type="checkbox"/> nyingine _____                                      |
| <input type="checkbox"/> pedi za kusafisha |                                                                              |

4. Unajiamini kiasi gani kwamba unajua nini wanafunzi wenzio wanatumia wakiwa hedhini?

*Sijiamini kabisa* 1 2 3 4 5 *Najiamini kabisa*

5. Kama wanatumia pedi, unajua namna wanavyozitupa/[wanavyozitokomeza zikishatumika]?

NDIO  HAPANA

6. Kam ulijibu ndio kwenye swali lililopita, ni njia gani wanayoitumia zaidi?

hawatupi (wanatumia zaidi ya mara moja)  
 ndoo ya taka  
 choo  
 kuzichoma moto  
 kuzizika  
 nyingine \_\_\_\_\_

**SUPPLEMENTARY MATERIAL**

QUESTIONNAIRE for "Period teasing, stigma and knowledge: a survey of adolescent boys and girls in Northern Tanzania"  
by Benschaul-Tolonen et al. 2020

Surveying date:

School ID:

Classroom ID:

Student ID:

---

**Kipengeele 6: Utafiti juu ya Shule**

1. Unajisikia salama kwenye vyoo vya shule?  
 NDIO  HAPANA
2. Huwa unajisikia salama kwenye vyoo vya shule ukiwa hedhini?  
 NDIO  HAPANA
3. Huwa unajua wakati wanafunzi wenzako wa kike wakiwa hedhini?  
 NDIO  HAPANA
4. Je, unahisi kama kupata hedhi ni kitu ambacho unapaswa kukificha?  
 NDIO  HAPANA
5. Je, ungesikia aibu kama wasichana wengine wangepundua kwamba upo hedhini?  
 NDIO  HAPANA
6. Je, ungesikia aibu kama wavulana wangepundua kwamba upo hedhini?  
 NDIO  HAPANA
7. Kama watu wangepundua kwamba umewahi kupata hedhi, ungeogopa kutaniwa?  
 NDIO  HAPANA  
Kama ndio, nani? Tafadhali chagua yote yanayokubali.  
 wasichana wa rika lako  wavulana wa rika lako  walimu  
 hakuna yoyote  mwingine \_\_\_\_\_
8. Kama watu wangepundua kwamba umewahi kupata hedhi, ungeogopa kuguswa kinyume na matakwa yako, au kusisitizwa kutoka na mtu fulani?  
 NDIO  HAPANA  
Kama ndio, na nani? Tafadhali chagua yote yanayokubali.  
 vijana wenzio  walimu  wanafamilia  hakuna mtu  
 wengine \_\_\_\_\_  
Kama ndio, una wasiwasi hii itatokea wapi?  
 vyoo vya kutumiwa na umati  
 vyoo vya shule  
 darasani  
 viwanja vya shule  
 nikiwa njiani kwenda shuleni au kurudi  
 nafasi za umma (kama vile viwanja vya umma)  
 nyumbani  
 sio popote  
 nyingine \_\_\_\_\_
9. Kama watu wangepundua kwamba umewahi kupata hedhi, ungeogopa mimba isiyopangwa au kutia aibu familia?

**SUPPLEMENTARY MATIERAL**

QUESTIONNAIRE for "Period teasing, stigma and knowledge: a survey of adolescent boys and girls in Northern Tanzania"  
by Benschaul-Tolonen et al. 2020

Surveying date:

School ID:

Classroom ID:

Student ID:

NDIO

HAPANA

10. Kama watu wangejua kwamba umewahi kupata hedhi, ungeogopa kwamba walimu wasingekuwa waelewa au wenye msaada?

NDIO

HAPANA

11. Kama watu wangejua kwamba umewahi kupata hedhi, ungeogopa kuhimizwa kuolewa au kuwa na mpenzi?

NDIO

HAPANA

12. Unakubaliana na kauli ifuatayo: "Nyumbani kwetu, wanawake/wasichana lazima waone aibu kuongelea au kuweka wazi hedhi yao (damu, maumivu, vifaa vya kujiweka safi) mbele ya wanafamilia."

nakubaliana sana

nakubaliana

katikati

sikubaliani

sikubaliani kabisa

13. Unakubaliana na kauli ifuatayo: "Nyumbani kwetu, wanawake na wasichana ambao wako hedhini wanazuiliwa kufanya shughuli fulani."

NDIO

HAPANA

Sijui

Kama ulijibu NDIO, shughuli gani? Chagua zote zinazokubalika

h)  Kushika vyanzo vya maji au wanyama

i)  Kupika

j)  Kufua

k)  Mikutano ya hadhara kama vile mikutano ya kidini, mikutano ya jumuiya

l)  Kulala sehemu yake ya kila siku

m)  Kutumia choo ambacho huwa anatumia siku zote

n)  Nyingine: \_\_\_\_\_

14. Unakubali kwamba wasichana lazima waolewe mara tu baada ya kuvunja ungo.

nakubaliana sana

nakubaliana

katikati

sikubaliani

sikubaliani kabisa

15. Unakubali kwamba wasichana wanakuwa wakubwa kiasi cha kutosha kuanza kufanya mapenzi wakishavunja ungo

nakubaliana sana

nakubaliana

katikati

sikubaliani

sikubaliani kabisa

**Kipengele 7: Jibu sehemu hii kama tu umewahi kupata hedhi.**

1. Umewahi kupata hedhi?

NDIO (endelea)

HAPANA (ruka hadi kipengele kinachofuata (Kipengele 7))

2. Wakati wa hedhi yako ya mwisho, je, kulikuwa na siku ambazo hukuweza kuja shuleni kwa sababu ya hedhi?

**SUPPLEMENTARY MATIERAL**

QUESTIONNAIRE for "Period teasing, stigma and knowledge: a survey of adolescent boys and girls in Northern Tanzania"  
by Benschaul-Tolonen et al. 2020

Surveying date:

School ID:

Classroom ID:

Student ID:

NDIO

HAPANA

Kama ndio ulibidi ukae nyumbani kwa siku ngapi kwa ajili ya hedhi? \_\_\_\_\_

Kama ndio, kwanini ulikosa kuja shule? Tafadhali chagua yote yanayokubalika.

maumivu

kutokuwa na cha kutumia

kuogopa nitavuja

kuogopa harufu

kuona aibu

hakuna ba kubadilishia [vifaa vya usafi]

kutoruhusiwa kushiriki

kusikia kutapika

kutojisikia raha

nyingine \_\_\_\_\_

3. Wakati wa hedhi yako ya mwisho, uliwahi kuondoka shule mapema kwa sababu ya hedhi yako?

NDIO

HAPANA

Kama ndio, kwanini uliondoka mapema? Tafadhali chagua yote yanayokubalika.

maumivu

nilichoka

kuhitaji kubadilishia [vifaa vya usafi]

kuhitaji kunawa

kuvuja

kutaniwa

nyingine \_\_\_\_\_

4. Wakati wa hedhi yako ya mwisho, je, **ulishiriki** darasani kama ambavyo huwa ni kawaida yako kushiriki (kipindi hauko hedhini)?

NDIO

HAPANA

Kama ndio, kwanini haukushiriki sana? Tafadhali chagua yote yanayokubalika.

woga

aibu

maumivu ya tumbo na jumla

vigumu kuwa makini

kuogopa kusimama

kuchoka

nyingine \_\_\_\_\_

5. Wakati wa hedhi yako ya mwisho, uliweza kuwa makini darasani kama ambavyo huwa ni kawaida yako kushiriki (kipindi hauko hedhini)?

NDIO

HAPANA

Kama hapana, kwanini haukuweza kuwa makini kama kawaida? Tafadhali chagua yote yanayokubalika.

woga

aibu

maumivu ya tumbo na jumla

vigumu kuwa makini

kuogopa kusimama

kuchoka

nyingine \_\_\_\_\_

6. Je, unaogopa kutaniwa kuhusu kuvuja damu ya hedhi shuleni?

NDIO

HAPANA

Kama ndio, na nani? Tafadhali chagua yote yanayokubalika.

wasichana wa rika lako

wavulana wa rika lako

walimu

hakuna mtu  wengine \_\_\_\_\_

7. Unaogopa kutaniwa kuhusu harufu shuleni ukiwa hedhini?

NDIO

HAPANA

## SUPPLEMENTARY MATERIAL

QUESTIONNAIRE for "Period teasing, stigma and knowledge: a survey of adolescent boys and girls in Northern Tanzania"  
by Benschaul-Tolonen et al. 2020

Surveying date:

School ID:

Classroom ID:

Student ID:

---

Kama ndio, nan ani? Tafadhali chagua yote yanayokubalika.

wasichana wa rika lako  wavulana wa rika lako  walimu

hakuna mtu  wengine \_\_\_\_\_

8. Unaogopa kujibu maswali darasani ukiwa hedhini?

NDIO  HAPANA

9. Unafikiri baadhi ya wanafunzi wenzako wanaweza kutambua ukiwa hedhini?

Ndio, mara nyingi  Ndio, mara chache  Hapana, kamwe

### Kipengele 8: Kutaniwa

1. Je, umewahi kutaniwa kuhusu hedhi yako?

NDIO  HAPANA

2. Kutoka kwa wale marafiki wa KIUME uliowaandika juu (Kipengele 2, Swali 2), **wangapi** umewaona wakiwatania wasichana kuhusu hedhi zao?

Hakuna  Rafiki 1  Marafiki 2  Marafiki 3  Marafiki 4  Marafiki 5

3. Kutoka kwa wale marafiki wa KIKE uliowaandika juu (Kipengele 2, Swali 1), umeshawahi kujadili kuhusu hedhi ni **wangapi** kati yao?

Hakuna  Rafiki 1  Marafiki 2  Marafiki 3  Marafiki 4  Marafiki 5

4. Je, ni sawa kwa msichana kumuomba mpenzi wake kulipia bidhaa?

NDIO  HAPANA

Kama ndio, zipi?

---

### Kipengele 9: Maswali juu ya Vitu Tunavyovijali

1. Walimu wangu hunitia moyo na kunipa msaada

nakubali sana  nakubali  katikati  sikubali  sikubali sana

2. Elimu ni ya muhimu zaidi kwa wavulana kuliko wasichana

nakubali sana  nakubali  katikati  sikubali  sikubali sana

3. Nina wasiwasi karibu muda wote

nakubali sana  nakubali  katikati  sikubali  sikubali sana

4. Nimeridhika na Maisha yangu

nakubali sana  nakubali  katikati  sikubali  sikubali sana

**Kama hujapata hedhi, nenda Kipengele 10.**

**SUPPLEMENTARY MATIERAL**

QUESTIONNAIRE for “Period teasing, stigma and knowledge: a survey of adolescent boys and girls in Northern Tanzania”  
by Benschaul-Tolonen et al. 2020

Surveying date:

School ID:

Classroom ID:

Student ID:

- 
1. Najisikia aibu nikiwa hedhini  
 nakubali sana       nakubali       katikati       sikubali       sikubali sana
  2. Najisikia mwenye afya nikipata hedhi  
 nakubali sana       nakubali       katikati       sikubali       sikubali sana
  3. Najisikia kutengwa kutoka wengine nikiwa hedhini  
 nakubali sana       nakubali       katikati       sikubali       sikubali sana
  4. Najisikia wasiwasi nikiwa hedhini  
 nakubali sana       nakubali       katikati       sikubali       sikubali sana
  5. Naogopa kwamba nanuka nikiwa hedhini  
 nakubali sana       nakubali       katikati       sikubali       sikubali sana
  6. Najisikia jasiri zaidi nikitumia pedi nikiwa hedhini  
 nakubali sana       nakubali       katikati       sikubali       sikubali sana

**Kipengele 10: Maswali ya Bei na WTP**

1. Tutakuuliza maswali kadhaa ambapo unaweza ukachagua kutoka vitu viwili. Tazama kila swali kama linajitegemea. Jibu kila swali kiukweli kwa sababu unaweza kujishindia chaguo lako.
  - a. Ungependelea ...?  
 Pedi ya kutumia zaidi ya mara moja      AU       TSH 0
  - b. Ungependelea ...?  
 Pedi ya kutumia zaidi ya mara moja      AU       TSH 1500
  - c. Ungependelea ...?  
 Pedi ya kutumia zaidi ya mara moja      AU       TSH 3000
  - d. Ungependelea ...?  
 Pedi ya kutumia zaidi ya mara moja      AU       TSH 4500
  - e. Ungependelea ...?  
 Pedi ya kutumia zaidi ya mara moja      AU       TSH 6000
  - f. Ungependelea ...?  
 Pedi ya kutumia zaidi ya mara moja      AU       TSH 7500
  - g. Ungependelea ...?  
 Pedi ya kutumia zaidi ya mara moja      AU       TSH 9000
  - h. Ungependelea ...?  
 Pedi ya kutumia zaidi ya mara moja      AU       TSH 10,000



**SUPPLEMENTARY MATIERAL**

QUESTIONNAIRE for "Period teasing, stigma and knowledge: a survey of adolescent boys and girls in Northern Tanzania"  
by Benschaul-Tolonen et al. 2020

Surveying date:

School ID:

Classroom ID:

Student ID:

i. Ungependelea ...?

Pedi ya kutumia zaidi ya mara moja      AU       TSH 11,500

j. Ungependelea ...?

Pedi ya kutumia zaidi ya mara moja      AU       TSH 13,000

**Kipengele 11: Demografia**

1. Jina lako nani? (la kwanza na la pili) \_\_\_\_\_

2. Umeishi muda gani katika makazi uliyopo? \_\_\_\_\_

3. Umezaliwa mwezi gani na mwaka gani? \_\_\_\_\_

4. Ulifikisha miaka mingapi kwenye tarehe yako ya kuzaliwa iliyopita? \_\_\_\_\_

5. Upo darasa la ngapi? \_\_\_\_\_

6. Ulianza shul ukiwa na umri gani? \_\_\_\_\_

7. Tafadhali chagua kabila lako linalokutambulisha

Mchagga

Mmasai

Msukuma

Mhaya

Msumbwa

kabila lingine: \_\_\_\_\_

8. Tafadhali chagua dhehebu linalokutambulisha

Mkristo

Muislamu

Dhehebu jingine: \_\_\_\_\_

Sina dhehebu

9. Unaishi na nani kwa sasa?

i.  wazazi

bibi na babu

peke yako

ii.  ndugu uliozaliwa nao

wanafamilia wengine

bweni la shule

iii.  bweni/hosteli binafsi

nyingine \_\_\_\_\_

10. Unaweza kuoga nyumbani?

iv.  NDIO

HAPANA

11. Unatumia jumla ya kiasi gani cha pesa kwa hedhi? \_\_\_\_\_

12. Chanzo chako kikuu cha pesa ni kipi? Tafadhali chagua moja.

**SUPPLEMENTARY MATIERAL**

QUESTIONNAIRE for "Period teasing, stigma and knowledge: a survey of adolescent boys and girls in Northern Tanzania"  
by Benschaul-Tolonen et al. 2020

Surveying date:

School ID:

Classroom ID:

Student ID:

---

mama

baba

mpenzi

dada / kaka

nyingine

kazi

ufadhili

13. Huwa unaitumia [hela] kufanya nini? Tafadhali chagua matumizi yako makuu matatu.

nguo

usafi binafsi

vipodozi

simu ya mkononi

pedi

nywele

vifaa vya shule

kitabu

usafiri

nyingine

14. Unatumia kiasi gani cha pesa kwenye pedi kila hedhi? \_\_\_\_\_

15. Umekosa shule ndani ya siku 7 zilizopita?

NDIO

HAPANA

Kama Ndio, sababu ilikuwa nini? \_\_\_\_\_

**SUPPLEMENTARY MATERIAL**

QUESTIONNAIRE for "Period teasing, stigma and knowledge: a survey of adolescent boys and girls in Northern Tanzania"  
by Benschaul-Tolonen et al. 2020

Surveying date:

School ID:

Classroom ID:

Student ID:

# BOYS QUESTIONNAIRE

## Questionnaire

### Section 1: Friends

1. We would now like you to tell us about the 5 closest **MALE** friends you have in the school. Please mention the names of your closest friends. Only list friends who go to this school, and who are enrolled in the same year as you, and that you count as friends.

*Write the full name and class of the friends mentioned*

- a. \_\_\_\_\_
- b. \_\_\_\_\_
- c. \_\_\_\_\_
- d. \_\_\_\_\_
- e. \_\_\_\_\_

2. In your opinion, who are the most popular boys in school?

*Write the full name and class of the boys mentioned*

- a. \_\_\_\_\_
- b. \_\_\_\_\_
- c. \_\_\_\_\_
- d. \_\_\_\_\_
- e. \_\_\_\_\_

### Section 2: Information

*We would now like to ask you some questions about periods.*

1. Why do a girl or a woman get her period? Select all that apply

- a.  personal sin
- b.  due to outside evil forces
- c.  because she did not become pregnant that month
- d.  release of bad blood
- e.  other
- f.  I do not know

2. Approximately how often does a girl (who have ever had her period) get her period? (Select one)

- once in her life
- once every year
- every week
- every month

3. How long does a menstrual period last on average? (Select one)

- one hour

**SUPPLEMENTARY MATERIAL**

QUESTIONNAIRE for “Period teasing, stigma and knowledge: a survey of adolescent boys and girls in Northern Tanzania”  
by Benschaul-Tolonen et al. 2020

Surveying date:

School ID:

Classroom ID:

Student ID:

---

- one day
- a few days
- two weeks
- all the time

4. At what age do girls generally get their period for the first time?

---

5. At what age do women stop getting their period?

---

6. Select the correct answer.

*Please select Yes or No to indicate if the following statements are true.*

h) When a girl reaches menarches (her first menstruation), it means she could get pregnant if she has sex.

- Yes                       No                       I do not know

i) Menstruation blood is the shedding of the endometrium lining

- Yes                       No                       I do not know

j) Menstrual period indicates a woman is not pregnant

- Yes                       No                       I do not know

k) Ovulation happens on average 14 days before period

- Yes                       No                       I do not know

l) Ovulation happens during period

- Yes                       No                       I do not know

m) Is it common for girls to have physical discomfort when they have their period?

- Yes                       No                       I do not know

n) Do girls experience the following on their period?

Bad mood                       Yes                       No                       I do not know

Stress                       Yes                       No                       I do not know

Fatigue                       Yes                       No                       I do not know

**Section 3: Personal Experience**

1. Has anyone told you about girls’ periods and why it is happening?

- YES                       NO

If so, who? Please select one.

- |                                        |                                      |
|----------------------------------------|--------------------------------------|
| <input type="checkbox"/> mother        | <input type="checkbox"/> father      |
| <input type="checkbox"/> grandmother   | <input type="checkbox"/> grandfather |
| <input type="checkbox"/> sister        | <input type="checkbox"/> brother     |
| <input type="checkbox"/> female friend | <input type="checkbox"/> male friend |

**SUPPLEMENTARY MATERIAL**

QUESTIONNAIRE for “Period teasing, stigma and knowledge: a survey of adolescent boys and girls in Northern Tanzania”  
by Benschaul-Tolonen et al. 2020

Surveying date:  
School ID:  
Classroom ID:  
Student ID:

---

- |                                                             |                                                      |
|-------------------------------------------------------------|------------------------------------------------------|
| <input type="checkbox"/> aunt or other female family member | <input type="checkbox"/> uncle or male family member |
| <input type="checkbox"/> health worker                      | <input type="checkbox"/> priest / religious leader   |
| <input type="checkbox"/> female teacher                     | <input type="checkbox"/> male teacher                |
| <input type="checkbox"/> girlfriend/partner                 | <input type="checkbox"/> other                       |

2. Did you ever receive information about menstruation from the following:

- |                                                |                              |                             |
|------------------------------------------------|------------------------------|-----------------------------|
| e) Internet                                    | <input type="checkbox"/> YES | <input type="checkbox"/> NO |
| f) Health worker                               | <input type="checkbox"/> YES | <input type="checkbox"/> NO |
| g) School curricula                            | <input type="checkbox"/> YES | <input type="checkbox"/> NO |
| h) Informational pamphlet<br>(ads, billboards) | <input type="checkbox"/> YES | <input type="checkbox"/> NO |

3. What was your reaction the first time that you learned about periods? Were you...  
(Please select one from each group 5, where 3 is neutral.)

|                                                                                               | 1                        | 2                        | 3                        | 4                        | 5                        |                      |
|-----------------------------------------------------------------------------------------------|--------------------------|--------------------------|--------------------------|--------------------------|--------------------------|----------------------|
|  surprised | <input type="checkbox"/> | <input type="checkbox"/> | <input type="checkbox"/> | <input type="checkbox"/> | <input type="checkbox"/> | not at all surprised |
|  afraid    | <input type="checkbox"/> | <input type="checkbox"/> | <input type="checkbox"/> | <input type="checkbox"/> | <input type="checkbox"/> | not at all afraid    |
|  excited   | <input type="checkbox"/> | <input type="checkbox"/> | <input type="checkbox"/> | <input type="checkbox"/> | <input type="checkbox"/> | not at all excited   |
|  confused  | <input type="checkbox"/> | <input type="checkbox"/> | <input type="checkbox"/> | <input type="checkbox"/> | <input type="checkbox"/> | not at all confused  |
|  confident | <input type="checkbox"/> | <input type="checkbox"/> | <input type="checkbox"/> | <input type="checkbox"/> | <input type="checkbox"/> | not at all confident |
|  disgusted | <input type="checkbox"/> | <input type="checkbox"/> | <input type="checkbox"/> | <input type="checkbox"/> | <input type="checkbox"/> | not at all disgusted |
|  proud     | <input type="checkbox"/> | <input type="checkbox"/> | <input type="checkbox"/> | <input type="checkbox"/> | <input type="checkbox"/> | not at all proud     |
|  ashamed   | <input type="checkbox"/> | <input type="checkbox"/> | <input type="checkbox"/> | <input type="checkbox"/> | <input type="checkbox"/> | not at all ashamed   |

**Section 4: Peers' Period Management**

1. Please estimate the share of female classmates who have received their periods. You will receive 1 USD if you guess the right answer.

- 0%    

**SUPPLEMENTARY MATERIAL**

QUESTIONNAIRE for “Period teasing, stigma and knowledge: a survey of adolescent boys and girls in Northern Tanzania”  
by Benschaul-Tolonen et al. 2020

Surveying date:  
School ID:  
Classroom ID:  
Student ID:

- 1-25%    
- 26-50%    
- 51-75%    
- 76-100%    

2. Sometimes girls are teased about their periods. Please estimate the share of female classmates who have been teased about their periods. You will receive 1 USD if you guess the right answer.

- 0%    
- 1-25%    
- 26-50%    
- 51-75%    
- 76-100%    

3. Please estimate **the most common** method of menstrual sanitation among your peers in the class. Please select only one.

- cloth
- tampons
- mattress stuffing
- nothing
- pads
- natural products (e.g. grass, leaves, cow dung)
- menstrual cup
- other \_\_\_\_\_

3. How confident are you that you know what your female classmates use when they are menstruating?

Not at all confident 1    2    3    4    5 Very confident

4. If they use sanitary pads, do you know how your female peers dispose of them?

- YES
- NO

5. If you answered yes to the last question above, what is the most common thing they do?

- They don't dispose of them (they use it over and over)
- dust bin
- toilet/latrine
- burn them
- bury them
- other \_\_\_\_\_

**SUPPLEMENTARY MATERIAL**

QUESTIONNAIRE for "Period teasing, stigma and knowledge: a survey of adolescent boys and girls in Northern Tanzania"  
by Benschaul-Tolonen et al. 2020

Surveying date:

School ID:

Classroom ID:

Student ID:

---

**Section 5: Menstruation Attitudes**

1. Do you feel safe in the latrines at school?  
 YES  NO
2. Do you know when your female classmates have their period?  
 YES  NO
3. Do you think that girls would feel ashamed if you knew they were on their period?  
 YES  NO
4. Do you feel like periods are something to hide at school?  
 YES  NO
5. Do you think that girls afraid of telling people about their period?  
 YES  NO
6. Is it appropriate for girls to talk about their periods in public?  
 Very appropriate  Appropriate  Neutral  Inappropriate  Very inappropriate
7. What would happen if a girl spoke about her period in public?  
\_\_\_\_\_
8. Sometimes it matters who girls talks to about their periods.
  - a. Is it appropriate for girls to talk about their periods with their female classmates?  
 Very appropriate  Appropriate  Neutral  Inappropriate  Very inappropriate
  - b. Is it appropriate for girls to talk about their periods with their male classmates?  
 Very appropriate  Appropriate  Neutral  Inappropriate  Very inappropriate
  - c. Is it appropriate for girls to talk about their periods with their female teacher?  
 Very appropriate  Appropriate  Neutral  Inappropriate  Very inappropriate
  - d. Is it appropriate for girls to about their periods with their male teacher?  
 Very appropriate  Appropriate  Neutral  Inappropriate  Very inappropriate
  - e. Is it appropriate for girls to about their periods with their father?  
 Very appropriate  Appropriate  Neutral  Inappropriate  Very inappropriate
  - f. Is it appropriate for girls to about their periods with their mother?  
 Very appropriate  Appropriate  Neutral  Inappropriate  Very inappropriate
9. Do you agree with the following statement: "In my house, women/girls should be ashamed to talk about or reveal their period (blood, pains, sanitary materials) in front of my family members."

**SUPPLEMENTARY MATERIAL**

QUESTIONNAIRE for "Period teasing, stigma and knowledge: a survey of adolescent boys and girls in Northern Tanzania"  
by Benschaul-Tolonen et al. 2020

Surveying date:

School ID:

Classroom ID:

Student ID:

---

strongly agree       agree       neutral       disagree       strongly disagree

10. Do you agree with the following statement: "In my house, women and girls who are menstruating are restricted from certain activities."

YES                       NO                       Don't know

If you answered YES, what activities? Select all that apply

- o)  Touching water sources or animals
- p)  Cooking
- q)  Washing dishes
- r)  Public gatherings like religious gatherings, community meetings
- s)  Sleeping in her normal spot
- t)  Using the normal toilet/latrine
- u)  Other: \_\_\_\_\_

11. Would you like to have someone that you can ask about periods?

YES                       NO

**Section 6: Teasing**

1. From the MALE friends you wrote above (Section 1, Question 1), **how many** have you seen teasing girls about their periods?

No friends     1 friend     2 friends     3 friends     4 friends     5 friends

2. From the friends mentioned above, with how many have you ever discussed periods?

No friends     1 friend     2 friends     3 friends     4 friends     5 friends

3. Do your close friends tease girls about their period? (if Never/Don't know, skip to Question 6)

Always     Often     Sometimes     Never     Don't know

4. If so, when does this happen?

- When they smell bad
- When their clothes get blood stains
- When they find pads or other products in girls' belongings
- When girls don't want to participate in sports or class because of their period
- When they think that a girl has her period

Other: \_\_\_\_\_

5. Why do you think that your friends tease girls about their periods?

- Because periods are embarrassing
- Because periods are unnatural
- Because it is due to outside evil forces



**SUPPLEMENTARY MATERIAL**

QUESTIONNAIRE for "Period teasing, stigma and knowledge: a survey of adolescent boys and girls in Northern Tanzania"  
by Benschaul-Tolonen et al. 2020

Surveying date:

School ID:

Classroom ID:

Student ID:

---

- Because periods are a personal sin
- Because boys are immature, or they don't understand periods

Other: \_\_\_\_\_

6. Have you ever teased a girl about their period?

- YES  NO

7. If YES, when? Check all that apply.

- When they smell bad
- When their clothes get blood stains
- When I find pads or other products in girls' belongings
- When girls don't want to participate in sports or class because of their period
- When I think that a girl has her period

Other: \_\_\_\_\_

8. If YES why did you tease them?

- Because periods are embarrassing
- Because periods are unnatural
- Because it is due to outside evil forces
- Because periods are a personal sin
- Because other boys were also teasing

Other: \_\_\_\_\_

9. When did you last tease a girl because of her period?

- In the last week
- In the last month
- In the last 6 months
- In the last year
- Over 1 year ago

10. When was the last time you saw a **classmate** tease a girl about their period?

- In the last week
- In the last month
- In the last 6 months
- In the last year
- Over 1 year ago

11. What do you do if you see a classmate tease a girl about their period?

- Nothing
- I talk with the classmate who teased in private
- I talk with the girl who was teased in private

**SUPPLEMENTARY MATERIAL**

QUESTIONNAIRE for “Period teasing, stigma and knowledge: a survey of adolescent boys and girls in Northern Tanzania”  
by Benschaul-Tolonen et al. 2020

Surveying date:

School ID:

Classroom ID:

Student ID:

---

- I tell the classmate to stop
- I also tease the girl
- I tell the teacher or another adult
  
- Other \_\_\_\_\_

**Section 7: Partners**

1. Have you ever had a girlfriend?  
 YES  NO
  
2. Do you have a girlfriend right now?  
 YES  NO (go to question 31)
  
3. How old is your girlfriend?  
\_\_\_\_\_
  
4. Is it okay for a girl to ask her boyfriend to pay for items?  
 YES  NO
  
- 30a. If so, what? (select all that apply)  
 clothes  food  pads  other \_\_\_\_\_
  
5. Is it okay for boys to expect girls to have sex with them after giving them gifts or paying for items?  
 YES  NO
  
6. Do you agree that girls should get married as soon as they get their period.  
 strongly agree  agree  neutral  disagree  strongly disagree
  
7. Do you agree that girls are old enough to have sex after they get their period  
 strongly agree  agree  neutral  disagree  strongly disagree

**Section 8: Value Questions**

1. My parents/caretakers encourage me to do well in school  
 strongly agree  agree  neutral  disagree  strongly disagree
  
2. My teachers give me a lot of encouragement and support  
 strongly agree  agree  neutral  disagree  strongly disagree
  
3. Education is more important for boys than for girls

**SUPPLEMENTARY MATERIAL**

QUESTIONNAIRE for “Period teasing, stigma and knowledge: a survey of adolescent boys and girls in Northern Tanzania”  
by Benschaul-Tolonen et al. 2020

Surveying date:

School ID:

Classroom ID:

Student ID:

- 
- strongly agree       agree       neutral       disagree       strongly disagree
4. Things in the future will work out OK for me  
 strongly agree       agree       neutral       disagree       strongly disagree
5. I am worried nearly all the time  
 strongly agree       agree       neutral       disagree       strongly disagree
6. I am satisfied with my life  
 strongly agree       agree       neutral       disagree       strongly disagree

**Section 9: Demographics**

1. What is your name? (first and last) \_\_\_\_\_
2. How long have you been living continuously in (place of residence)? \_\_\_\_\_
3. In what month and year were you born? \_\_\_\_\_
4. How old were you at your last birthday? \_\_\_\_\_
5. What grade are you in? \_\_\_\_\_
6. At what age did you start school? \_\_\_\_\_
7. Who do you currently live with?  
 parents       grandparents       alone  
 siblings       other family members       boarding school  
 boarding house/hostel       other \_\_\_\_\_
8. Can you wash your body at home?  
 YES       NO
9. How much money do you spend per month total? \_\_\_\_\_ (order changed)
10. What is your main source of money? Please select one.  
 mother       father       girlfriend/boyfriend  
 sister /brother       other       work  
 scholarship
11. What do you spend it on? Please select the top three expenses.  
 clothes

**SUPPLEMENTARY MATERIAL**

QUESTIONNAIRE for “Period teasing, stigma and knowledge: a survey of adolescent boys and girls in Northern Tanzania”  
by Benschaul-Tolonen et al. 2020

Surveying date:  
School ID:  
Classroom ID:  
Student ID:

---

- personal hygiene
- make up
- mobile phone
- hair
- school products
- food
- transport
- other

12. Did you miss school in the past 7 days?

- YES                       NO

If Yes, what was the reason? \_\_\_\_\_

## **GIRLS QUESTIONNAIRE**

### **Questionnaire**

#### **Section 1: Friends**

1. We would now like you to tell us about the 5 closest **FEMALE** friends you have in the school. Please mention the names of your closest friends. Only list friends who go to this school, and who are enrolled in the same year as you, and that you count as friends.

*Write the full name and class of the friends mentioned*

- a. \_\_\_\_\_
- b. \_\_\_\_\_
- c. \_\_\_\_\_
- d. \_\_\_\_\_
- e. \_\_\_\_\_

2. We would now like you to tell us about the 5 closest **MALE** friends you have in the school. Please mention the names of your closest friends. Only list friends who go to this school, and who are enrolled in the same year as you, and that you count as friends.

*Write the full name and class of the friends mentioned*

- a. \_\_\_\_\_
- b. \_\_\_\_\_
- c. \_\_\_\_\_
- d. \_\_\_\_\_
- e. \_\_\_\_\_

#### **Section 2: Information**

**SUPPLEMENTARY MATERIAL**

QUESTIONNAIRE for "Period teasing, stigma and knowledge: a survey of adolescent boys and girls in Northern Tanzania"  
by Benschaul-Tolonen et al. 2020

Surveying date:

School ID:

Classroom ID:

Student ID:

---

*We would now like to ask you some questions about periods.*

1. Why do a girl or a woman get her period?. Select all that apply.

- personal sin
- due to outside evil forces
- because she did not become pregnant that month
- release of bad blood
- other
- I do not know

2. Approximately, how often does a girl (who have ever had her period) get her period? Select one.

- once in her life
- once every year
- every week
- every month
- I do not know

3. How long does a menstrual period last on average? Select one.

- one hour
- one day
- a few days
- two weeks
- all the time
- I do not know

4. At what age do girls generally get their period for the first time?

---

5. At what age do women stop getting their period?

---

6. Select the correct answer

*Please select Yes or No to indicate if the following statements are true.*

h) When a girl reaches menarches (her first menstruation), it means she could get pregnant if she has sex.

- Yes                       No                       I do not know

i) Menstruation blood is the shedding of the endometrium lining

- Yes                       No                       I do not know

j) Menstrual period indicates a woman is not pregnant

- Yes                       No                       I do not know

k) Ovulation happens on average 14 days before period

- Yes                       No                       I do not know

l) Ovulation happens during period

**SUPPLEMENTARY MATIERAL**

QUESTIONNAIRE for “Period teasing, stigma and knowledge: a survey of adolescent boys and girls in Northern Tanzania”  
by Benschaul-Tolonen et al. 2020

Surveying date:  
School ID:  
Classroom ID:  
Student ID:

---

- Yes                       No                       I do not know
- m) Is it common for girls to have physical discomfort when they have their period?
- Yes                       No                       I do not know
- n) Do most girls experience the following on their period?
- Bad mood                       Yes                       No                       I do not know
- Stress                       Yes                       No                       I do not know
- Fatigue                       Yes                       No                       I do not know

**Section 3: Personal Experience**

1. Has anyone told you about girls’ periods and why it is happening?

- YES                       NO

If so, who? Please select all that apply.

- |                                                             |                                                      |
|-------------------------------------------------------------|------------------------------------------------------|
| <input type="checkbox"/> mother                             | <input type="checkbox"/> father                      |
| <input type="checkbox"/> grandmother                        | <input type="checkbox"/> grandfather                 |
| <input type="checkbox"/> sister                             | <input type="checkbox"/> brother                     |
| <input type="checkbox"/> female friend                      | <input type="checkbox"/> male friend                 |
| <input type="checkbox"/> aunt or other female family member | <input type="checkbox"/> uncle or male family member |
| <input type="checkbox"/> health worker                      | <input type="checkbox"/> priest / religious leader   |
| <input type="checkbox"/> female teacher                     | <input type="checkbox"/> male teacher                |
| <input type="checkbox"/> boyfriend/partner                  | <input type="checkbox"/> other                       |

2. Did you ever receive information about menstruation from the following:

- |                                                      |                              |                             |
|------------------------------------------------------|------------------------------|-----------------------------|
| a. Internet                                          | <input type="checkbox"/> YES | <input type="checkbox"/> NO |
| b. Health worker                                     | <input type="checkbox"/> YES | <input type="checkbox"/> NO |
| c. School materials (books, classes, homework, etc.) | <input type="checkbox"/> YES | <input type="checkbox"/> NO |
| d. Informational pamphlet<br>(ads, billboards)       | <input type="checkbox"/> YES | <input type="checkbox"/> NO |

3. What was your reaction the first time that you learned about periods? Were you...  
(Please select one from each group 5, where 3 is neutral.)

|                                                                                               | 1                        | 2                        | 3                        | 4                        | 5                        |                      |
|-----------------------------------------------------------------------------------------------|--------------------------|--------------------------|--------------------------|--------------------------|--------------------------|----------------------|
|  surprised | <input type="checkbox"/> | <input type="checkbox"/> | <input type="checkbox"/> | <input type="checkbox"/> | <input type="checkbox"/> | not at all surprised |
|  afraid    | <input type="checkbox"/> | <input type="checkbox"/> | <input type="checkbox"/> | <input type="checkbox"/> | <input type="checkbox"/> | not at all afraid    |
|  excited   | <input type="checkbox"/> | <input type="checkbox"/> | <input type="checkbox"/> | <input type="checkbox"/> | <input type="checkbox"/> | not at all excited   |
|  confused  | <input type="checkbox"/> | <input type="checkbox"/> | <input type="checkbox"/> | <input type="checkbox"/> | <input type="checkbox"/> | not at all confused  |

**SUPPLEMENTARY MATERIAL**

QUESTIONNAIRE for "Period teasing, stigma and knowledge: a survey of adolescent boys and girls in Northern Tanzania"  
by Benschaul-Tolonen et al. 2020

Surveying date:

School ID:

Classroom ID:

Student ID:

---

|                                                                                   |           |                          |                          |                          |                          |                          |                      |
|-----------------------------------------------------------------------------------|-----------|--------------------------|--------------------------|--------------------------|--------------------------|--------------------------|----------------------|
|  | confident | <input type="checkbox"/> | <input type="checkbox"/> | <input type="checkbox"/> | <input type="checkbox"/> | <input type="checkbox"/> | not at all confident |
|  | disgusted | <input type="checkbox"/> | <input type="checkbox"/> | <input type="checkbox"/> | <input type="checkbox"/> | <input type="checkbox"/> | not at all disgusted |
|  | proud     | <input type="checkbox"/> | <input type="checkbox"/> | <input type="checkbox"/> | <input type="checkbox"/> | <input type="checkbox"/> | not at all proud     |
|  | ashamed   | <input type="checkbox"/> | <input type="checkbox"/> | <input type="checkbox"/> | <input type="checkbox"/> | <input type="checkbox"/> | not at all ashamed   |

4. Has anyone told you what you should do when you start menstruating?

YES

NO

If so, what advice did you receive? Please select all that apply.

how to use towels/fabrics/linen

how to stay clean/wash

how to manage pain

things/activities to avoid during menstruation

other \_\_\_\_\_

5. Check all the people that you would **WANT** to talk to about your period.

mother

grandmother

sister

female friend

aunt or other female family member

health worker

female teacher

boyfriend/partner

no one

father

grandfather

brother

male friend

uncle or male family member

priest / religious leader

male teacher

other

6. With whom would you **ABSOLUTELY NOT** want to talk to about your period. Please select all that apply.

mother

grandmother

sister

female friend

aunt or other female family member

health worker

female teacher

boyfriend/partner

no one

father

grandfather

brother

male friend

uncle or male family member

priest / religious leader

male teacher

other

**SUPPLEMENTARY MATERIAL**

QUESTIONNAIRE for “Period teasing, stigma and knowledge: a survey of adolescent boys and girls in Northern Tanzania”  
by Benschaul-Tolonen et al. 2020

Surveying date:  
School ID:  
Classroom ID:  
Student ID:

---

7. Have you had your period?  
 Yes (**continue to next question**)     No (**go to Section 4, Question 1**)
8. At what age did you have your first period? \_\_\_\_\_
9. Was the first time that you got your period a positive, negative, or neutral experience?  
 positive                       negative                       neutral
10. What was your reaction the first time that you got your period? Were you...  
(Please select one from each group 5, where 3 is neutral.)

|                                                                                               | 1                        | 2                        | 3                        |                      |
|-----------------------------------------------------------------------------------------------|--------------------------|--------------------------|--------------------------|----------------------|
|  surprised   | <input type="checkbox"/> | <input type="checkbox"/> | <input type="checkbox"/> | not at all surprised |
|  afraid     | <input type="checkbox"/> | <input type="checkbox"/> | <input type="checkbox"/> | not at all afraid    |
|  excited   | <input type="checkbox"/> | <input type="checkbox"/> | <input type="checkbox"/> | not at all excited   |
|  confused  | <input type="checkbox"/> | <input type="checkbox"/> | <input type="checkbox"/> | not at all confused  |
|  confident | <input type="checkbox"/> | <input type="checkbox"/> | <input type="checkbox"/> | not at all confident |
|  disgusted | <input type="checkbox"/> | <input type="checkbox"/> | <input type="checkbox"/> | not at all disgusted |
|  proud     | <input type="checkbox"/> | <input type="checkbox"/> | <input type="checkbox"/> | not at all proud     |
|  ashamed   | <input type="checkbox"/> | <input type="checkbox"/> | <input type="checkbox"/> | not at all ashamed   |

11. Think back to the time before you got your period. Did anyone tell you about your period before it started?  
 YES                                       NO

If so, who? Please select all that apply.

If so, who? Please select all that apply.

- |                                                             |                                                      |
|-------------------------------------------------------------|------------------------------------------------------|
| <input type="checkbox"/> mother                             | <input type="checkbox"/> father                      |
| <input type="checkbox"/> grandmother                        | <input type="checkbox"/> grandfather                 |
| <input type="checkbox"/> sister                             | <input type="checkbox"/> brother                     |
| <input type="checkbox"/> female friend                      | <input type="checkbox"/> male friend                 |
| <input type="checkbox"/> aunt or other female family member | <input type="checkbox"/> uncle or male family member |



**SUPPLEMENTARY MATERIAL**

QUESTIONNAIRE for "Period teasing, stigma and knowledge: a survey of adolescent boys and girls in Northern Tanzania"  
by Benschaul-Tolonen et al. 2020

Surveying date:

School ID:

Classroom ID:

Student ID:

- health worker
- female teacher
- boyfriend/partner

- priest / religious leader
- male teacher
- other

12. How many days does your period last?

\_\_\_\_\_ days

13. From a scale of 1 to 5 where 1 is no pain and 5 very strong pain; How much physical pain do you experience when you have your period?

**1**      **2**      **3**      **4**      **5**  
*No pain at all*                          *Very strong pain*

14. On a scale from 1 to 5, where 1 is less pain and 5 is more pain and 3 is the same; How do you think that the pain you feel during your period is compared to the pain that your peers experience?

**1**      **2**      **3**      **4**      **5**  
*I experience much less pain*                          *I experience much stronger pain*

15. From a scale of 1 to 5 where 1 is very light bleeding and 5 very heavy bleeding; How much do you bleed when you have your period?

**1**      **2**      **3**      **4**      **5**  
*very light bleeding*                          *Very heavy bleeding*

16. On a scale from 1 to 5, where 1 is lighter bleeding and 5 is heavier bleeding and 3 is the same; Do you think that you bleed more, less, or the same as your peers?

**1**      **2**      **3**      **4**      **5**  
*I have much lighter bleeding*                          *I have much heavier bleeding*

17. A menstrual cycle lasts from the first day of period (bleeding) until the day before the beginning of the next period (first day of bleeding). Do you know how long your menstrual cycle is on average? In other word, do you keep track of how often do you bleed?

YES       NO

18. Do you think that for you the time between bleedings varies a lot?

YES       NO

19. Do you find it hard to know when you are going to bleed soon and be prepared?

YES       NO

20. During your period, or immediately before, do you ever have...:

Bad mood?       YES       NO

Stress or anxiety?       YES       NO

Fatigue?       YES       NO

21. Do you use painkillers (like for example aspirin) to manage pain when you have your period?

Always       Sometimes       Rarely       Never

## SUPPLEMENTARY MATERIAL

QUESTIONNAIRE for "Period teasing, stigma and knowledge: a survey of adolescent boys and girls in Northern Tanzania"  
by Benschaul-Tolonen et al. 2020

Surveying date:

School ID:

Classroom ID:

Student ID:

---

### BREAK HERE FOR SECTION 4 WITH AFRIPADS

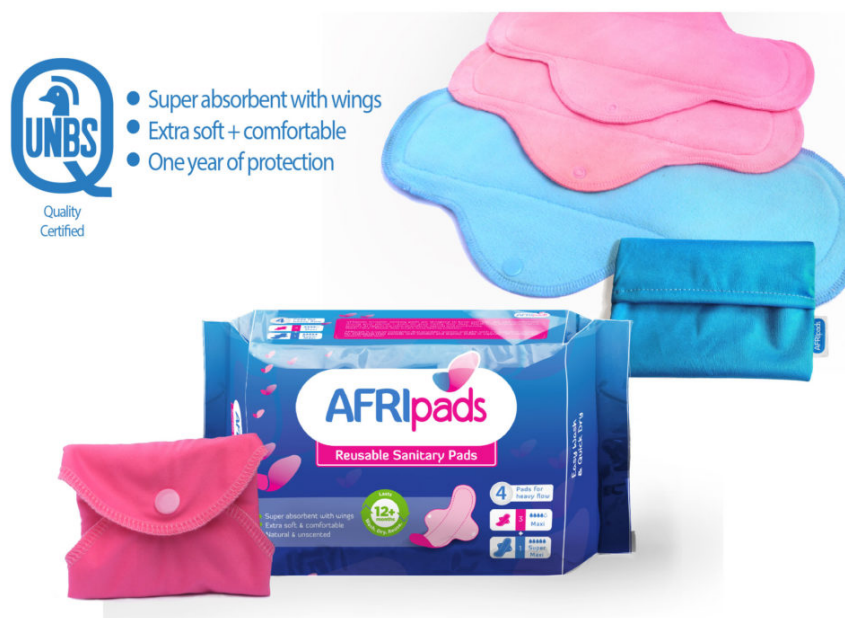

*Pedi za kusafisha zinazotumika zaidi ya mara moja ni kitambaa kinachovaliwa kwenye chupi (nguo ya ndani) kuzuia damu ya hedhi kuvujia kwenye nguo. Inaweza kuoshwa, kukaushwa na kutumiwa kwa mwaka 1. Picha hapo juu inaonesha Afripads, aina mojawapo ya pedi za kutumiwa zaidi ya mara moja. Kila pakiti ina pedi 4.*

1. *Je umewahi Kuona ama Kusikia kuhusu pedi za kusafisha zinazotumika Zaidi ya mara moja?*

Ndio

Hapana

2. *Je umewahi Kutumia pedi za kusafisha zinazotumika Zaidi ya mara moja?*

Ndio

Hapana

3. What do you **sometimes** use when you are menstruating? Please select **all that apply**.

cloth

pads

tampons

natural materials (grass, leaves, cow dung, etc.)

mattress stuffing

menstrual cup

nothing

other \_\_\_\_\_

4. What do you **most often** use when you are menstruating? Please select **only one**.

cloth

pads

tampons

natural materials (grass, leaves, cow dung, etc.)

mattress stuffing

menstrual cup

nothing

other \_\_\_\_\_

**SUPPLEMENTARY MATERIAL**

QUESTIONNAIRE for “Period teasing, stigma and knowledge: a survey of adolescent boys and girls in Northern Tanzania”  
by Benschaul-Tolonen et al. 2020

Surveying date:  
School ID:  
Classroom ID:  
Student ID:

---

5. Do you ever use cloth?

YES  NO

a. If you ever use a cloth, do you wash the fabrics you use during menstruation with soap?

YES  NO  I don't use a cloth

b. If you ever use a cloth, do you dry the fabrics you have washed in the sun?

YES  NO  I don't use a cloth

If no, where \_\_\_\_\_

6. What is your preferred method of menstrual sanitation? Please **select one**.

cloth  pads  
 tampons  natural products (grass, leaves, cow dung, etc.)  
 mattress stuffing  menstrual cup  
 nothing  other \_\_\_\_\_

7. Do you always use your preferred method?

YES  NO

8. Think of a month when you did not use your preferred method. Why did you **NOT** use your preferred method?

not enough money to buy  the method wasn't available  
 no parental permission  I didn't know how to  
 I was embarrassed  the method wasn't safe  
 other \_\_\_\_\_

9. How often do you change sanitation during your period each day? \_\_\_\_\_

10. How do you dispose of your sanitary product (**the one that you chose in question 24**)?

I don't (I use it over and over)  dust bin  
 toilet/latrine  burn it  
 bury it  other \_\_\_\_\_

**Section 4: Peers' Period Management (UPDATED TO SECTION 5)**

1. Please estimate the share of female classmates who have received their periods.

0%   
 1-25%   
 26-50%   
 51-75% 

**SUPPLEMENTARY MATERIAL**

QUESTIONNAIRE for “Period teasing, stigma and knowledge: a survey of adolescent boys and girls in Northern Tanzania”  
by Benshaul-Tolonen et al. 2020

Surveying date:  
School ID:  
Classroom ID:  
Student ID:

---

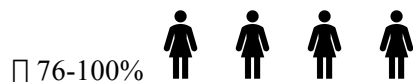

2. Sometimes girls are teased about their periods. Please estimate the share of female classmates who have been teased about their periods. .

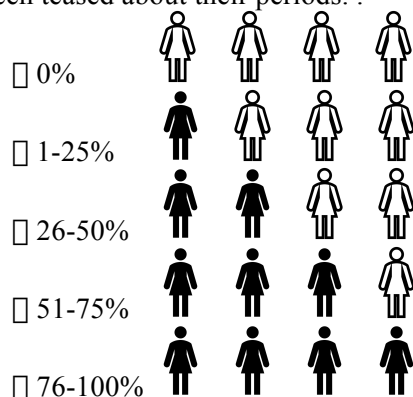

3. Please estimate **the most common** method of menstrual sanitation among your peers in the class. Please select only one.

- |                                            |                                                                            |
|--------------------------------------------|----------------------------------------------------------------------------|
| <input type="checkbox"/> cloth             | <input type="checkbox"/> pads                                              |
| <input type="checkbox"/> tampons           | <input type="checkbox"/> natural materials (grass, leaves, cow dung, etc.) |
| <input type="checkbox"/> mattress stuffing | <input type="checkbox"/> menstrual cup                                     |
| <input type="checkbox"/> nothing           | <input type="checkbox"/> other _____                                       |

4. How confident are you that you know what your female classmates use when they are menstruating?

*Not at all confident*       1       2       3       4       5      *Very confident*

5. If they use sanitary pads, do you know how your female peers dispose of them?

YES       NO

6. If you answered yes to the question above, what is the most common thing they do?

- They don't dispose of them (they use it over and over)
- dust bin
- toilet/latrine
- burn them
- bury them
- other \_\_\_\_\_

**Section 6: Management at School**

1. Do you feel safe in the latrines at school?

YES       NO

2. Do you feel safe in the latrines at school when you have your period?

**SUPPLEMENTARY MATIERAL**

QUESTIONNAIRE for "Period teasing, stigma and knowledge: a survey of adolescent boys and girls in Northern Tanzania"  
by Benschaul-Tolonen et al. 2020

Surveying date:

School ID:

Classroom ID:

Student ID:

---

YES

NO

3. Do you know when your female classmates have their period?

YES

NO

4. Do you feel like having period is something that one must hide from others?

YES

NO

5. Would you feel ashamed if other girls knew that you were on your period?

YES

NO

6. Would you feel ashamed if boys knew that you were on your period?

YES

NO

7. If people knew that you have ever received your period, would you be afraid of teasing?

YES

NO

If so, by whom? Please select all that apply.

female peers

male peers

teachers

no one

other \_\_\_\_\_

8. If people knew that you have ever received your period, would you be afraid of being touched against your will, or asked insistently to go out with someone?

YES

NO

If so, by whom? Please select all that apply.

peers

teachers

family members

no one

other \_\_\_\_\_

If so, where are you afraid that this would occur?

public bathrooms

school bathrooms

class room

school yard

on my way to or from school

public space (such as a square)

home

nowhere

other \_\_\_\_\_

9. If people knew that you have your period, would you be afraid of unwanted pregnancies or dishonor?

YES

NO

10. If people knew that you have ever received your period, would you be afraid of teachers not being understanding or helpful?

YES

NO

11. If people knew that you have ever received your period, would you afraid of the pressure to marry or take a boyfriend?

YES

NO

**SUPPLEMENTARY MATERIAL**

QUESTIONNAIRE for "Period teasing, stigma and knowledge: a survey of adolescent boys and girls in Northern Tanzania"  
by Benschaul-Tolonen et al. 2020

Surveying date:

School ID:

Classroom ID:

Student ID:

---

12. Do you agree with the following statement: "In my house, women/girls should be ashamed to talk about or reveal their period (blood, pains, sanitary materials) in front of my family members."

strongly agree       agree       neutral       disagree       strongly disagree

13. Do you agree with the following statement: "In my house, women and girls who are menstruating are restricted from certain activities."

YES       NO       Don't know

If you answered YES, what activities? Select all that apply

- v)  Touching water sources or animals
- w)  Cooking
- x)  Washing dishes
- y)  Public gatherings like religious gatherings, community meetings
- z)  Sleeping in her normal spot
- aa)  Using the normal toilet/latrine
- bb)  Other: \_\_\_\_\_

14. Do you agree that girls should get married as soon as they get their period.

strongly agree       agree       neutral       disagree       strongly disagree

15. Do you agree that girls are old enough to have sex after they get their period

strongly agree       agree       neutral       disagree       strongly disagree

**Section 7: Only fill this in if you ever had your period.**

1. Did you ever have a period?

YES (continue)       NO (skip to next section (Section 7)) (NOW SECTION 8)

2. During your last period, were there days when you could not come to school because of your period?

YES       NO

If yes how many days did you have to stay at home because of your period? \_\_\_\_\_

If yes, why did you miss school? Please select all that apply.

- pain
- nothing to use
- afraid I will leak
- afraid of odor
- ashamed
- no place to change
- not allowed to take part
- feel sick
- don't feel comfortable
- other \_\_\_\_\_

3. During your last period, did you ever leave school early because of your period?

**SUPPLEMENTARY MATERIAL**

QUESTIONNAIRE for “Period teasing, stigma and knowledge: a survey of adolescent boys and girls in Northern Tanzania”  
by Benschaul-Tolonen et al. 2020

Surveying date:  
School ID:  
Classroom ID:  
Student ID:

---

YES  NO

If yes, why did you leave early? Please select all that apply.

pain  tired  
 needed to change  needed to wash  
 leaked  teased  
 other \_\_\_\_\_

4. During your last period, did you **participate** as much in class as you normally do (when you do not have your period)?

YES  NO

If no, why did you not participate as much? Please select all that apply.

fear  shame  
 cramps and pain  hard to concentrate  
 afraid to stand up  tired  
 other \_\_\_\_\_

5. During your last period, did you **concentrate** as much in class as you normally do (when you do not have your period)?

YES  NO

If no, why did you not concentrate as much? Please select all that apply.

fear  shame  
 cramps and pain  hard to concentrate  
 afraid to stand up  tired  
 other \_\_\_\_\_

6. Are you afraid of being teased about leaking menstrual blood at school?

YES  NO

If so, by whom? Please select all that apply.

female peers  male peers  teachers  no one  other \_\_\_\_\_

7. Are you afraid of being teased about odor at school when you have your period?

YES  NO

If so, by whom? Please select all that apply.

female peers  male peers  teachers  no one  other \_\_\_\_\_

8. Are you afraid of answering a question in the classroom when you have your period?

YES  NO

9. Do you think that some of your classmates can tell when you have your period?

Yes, most of the time  Yes, only sometimes  No, never

**Section 8: Teasing**

1. Have you ever been teased about your period?

**SUPPLEMENTARY MATERIAL**

QUESTIONNAIRE for “Period teasing, stigma and knowledge: a survey of adolescent boys and girls in Northern Tanzania”  
by Benschaul-Tolonen et al. 2020

Surveying date:  
School ID:  
Classroom ID:  
Student ID:

---

YES

NO

2. From the MALE friends you wrote above (Section 2, Question 2), **how many** have you seen teasing girls about their periods?

No friend     1 friend     2 friends     3 friends     4 friends     5 friends

3. From the FEMALE friends you wrote above (Section 2, Question 1), with **how many** have you ever discussed periods?

No friend     1 friend     2 friends     3 friends     4 friends     5 friends

4. Is it okay for a girl to ask her boyfriend to pay for items?

YES                       NO

If so, what?

---

**Section 9: Value Questions**

1. My parents/caretakers encourage me to do well in school

strongly agree     agree     neutral     disagree     strongly disagree

2. My teachers give me a lot of encouragement and support

strongly agree     agree     neutral     disagree     strongly disagree

3. Education is more important for boys than for girls

strongly agree     agree     neutral     disagree     strongly disagree

4. Things in the future will work out OK for me

strongly agree     agree     neutral     disagree     strongly disagree

5. I am worried nearly all the time

strongly agree     agree     neutral     disagree     strongly disagree

6. I am satisfied with my life

strongly agree     agree     neutral     disagree     strongly disagree

**If you have NOT had your period, go to Section 9.**

7. I feel ashamed during my period

strongly agree     agree     neutral     disagree     strongly disagree

8. I feel healthy when I have my period

strongly agree     agree     neutral     disagree     strongly disagree

9. I feel isolated from others during my period



**SUPPLEMENTARY MATERIAL**

QUESTIONNAIRE for “Period teasing, stigma and knowledge: a survey of adolescent boys and girls in Northern Tanzania”  
by Benschaul-Tolonen et al. 2020

Surveying date:  
School ID:  
Classroom ID:  
Student ID:

---

- strongly agree       agree       neutral       disagree       strongly disagree
10. I feel worried during my period  
 strongly agree       agree       neutral       disagree       strongly disagree
11. I worry that I smell when I have my period  
 strongly agree       agree       neutral       disagree       strongly disagree
12. I feel more confident during my period when using pads  
 strongly agree       agree       neutral       disagree       strongly disagree

**Section 10: Price Questions and WTP**

1. We will ask you a few questions where you can choose between two items. Treat each question as a separate question. Answer each question truthfully because you might win your choice.
- a. Would you prefer...?  
 A reusable sanitary pad      OR       TSH 0
  - b. Would you prefer...?  
 A reusable sanitary pad      OR       TSH 1500
  - c. Would you prefer...?  
 A reusable sanitary pad      OR       TSH 3000
  - d. Would you prefer...?  
 A reusable sanitary pad      OR       TSH 4500
  - e. Would you prefer...?  
 A reusable sanitary pad      OR       TSH 6000
  - f. Would you prefer...?  
 A reusable sanitary pad      OR       TSH 7500
  - g. Would you prefer...?  
 A reusable sanitary pad      OR       TSH 9000
  - h. Would you prefer...?  
 A reusable sanitary pad      OR       TSH 10,000
  - i. Would you prefer...?  
 A reusable sanitary pad      OR       TSH 11,500
  - j. Would you prefer...?  
 A reusable sanitary pad      OR       TSH 13,000

**Section 11: Demographics**

**SUPPLEMENTARY MATERIAL**

QUESTIONNAIRE for "Period teasing, stigma and knowledge: a survey of adolescent boys and girls in Northern Tanzania"  
by Benschaul-Tolonen et al. 2020

Surveying date:

School ID:

Classroom ID:

Student ID:

- 
1. What is your name? (first and last) \_\_\_\_\_
  2. How long have you been living continuously in (place of residence)? \_\_\_\_\_
  3. In what month and year were you born? \_\_\_\_\_
  4. How old were you at your last birthday? \_\_\_\_\_
  5. What grade are you in? \_\_\_\_\_
  6. At what age did you start school? \_\_\_\_\_
  7. Please select the ethnicity that best describes you:  
 Chagga  
 Masai  
 Sukuma  
 Wahaya  
 Wasumbwa  
 Other : \_\_\_\_\_
  8. Please select the religion that best describes you:  
 Christian  
 Muslim  
 Chagga  
 Other : \_\_\_\_\_  
 No Religion
  9. Who do you currently live with?
    - i.  parents  grandparents  alone
    - ii.  siblings  other family members  boarding school
    - iii.  boarding house/hostel  other\_\_\_\_\_
  10. Can you wash your body at home?
    - i.  YES  NO
  11. How much money do you spend per month total? \_\_\_\_\_
  12. What is your main source of money? Please select one.  
 mother  father  girlfriend/boyfriend  
 sister /brother  other  work  
 scholarship
  13. What do you spend it on? Please select the top three expenses.  
 clothes

**SUPPLEMENTARY MATERIAL**

QUESTIONNAIRE for "Period teasing, stigma and knowledge: a survey of adolescent boys and girls in Northern Tanzania"  
by Benschaul-Tolonen et al. 2020

Surveying date:

School ID:

Classroom ID:

Student ID:

---

- personal hygiene
- make up
- mobile phone
- sanitary pads
- hair
- school products
- food
- transport
- other

14. How much do you spend on sanitary pads per month? \_\_\_\_\_

15. Did you miss school in the past 7 days?

YES

NO

If Yes, what was the reason? \_\_\_\_\_
